28 \*All correspondence should be directed to: Dr. Benedict Chambers, Center for  
29 Infectious Medicine, Department of Medicine, Karolinska Institutet, Karolinska  
30 University Hospital Huddinge, 141 86 Stockholm, Sweden. Email:  
31 Benedict.Chambers@ki.se

32

33 None of the authors have any conflicts of interest.

34

35

36 **ABSTRACT** (*should be max 150, now 136 words*)

37 Although PD-1 was shown to be a hallmark of T cells exhaustion, controversial studies  
38 have been reported on the role of PD-1 on NK cells. Here, we found by flow cytometry  
39 and single cell RNA sequencing analysis that PD-1 can be expressed on MHC class I-  
40 deficient tumor-infiltrating NK cells *in vivo*. We also demonstrate distinct alterations in  
41 the phenotype of *PD-1*-deficient NK cells which in part could be attributed to a  
42 decrease in tumor-infiltrating NK cells in *PD-1*-deficient mice. NK cells from *PD-1*-  
43 deficient mice exhibited a more mature phenotype which might reduce their capacity to  
44 migrate and kill *in vivo*. Finally, our results demonstrate that PD-L1 molecules in  
45 membranes of *PD-1*-deficient NK cells migrate faster than in NK cells from wildtype  
46 mice, suggesting that PD-1 and PD-L1 form *cis* interactions with each other on NK  
47 cells.

48

49

50

## 51 **INTRODUCTION**

52 Natural killer (NK) cells are innate lymphoid cells (ILCs) that can kill tumour cells,  
53 stressed or virus-infected cells <sup>1-3</sup>. NK cell activation is dependent on signals from  
54 activating and inhibitory receptors as well as pro-inflammatory cytokines <sup>4</sup>. Activating  
55 NK cell receptors can recognise stress-induced molecules, which induce  
56 phosphorylation events that may culminate in the release of cytotoxic granules and  
57 cytokines <sup>5</sup>. Healthy cells are protected from killing by NK cells because of the  
58 expression of self-MHC class I molecules (MHC-I) on their surface which act as ligands  
59 for dominant inhibitory receptors <sup>6</sup>. These receptors include killer-cell immunoglobulin-  
60 like receptors (KIRs) in humans, Ly49 molecules in mouse and NKG2A in both species  
61 <sup>7</sup>. Engagement of inhibitory receptors results in recruitment of phosphates such as SHP-  
62 1, SHP-2 and SHIP-1, and dephosphorylation of signaling molecules which prevents  
63 NK cell-mediated killing.

64

65 NK cells express also non-MHC-I recognizing inhibitory receptors such as TIGIT,  
66 LAG-3, CTLA-4 and PD-1, molecules known as checkpoint receptors. Clinically,  
67 antibodies against CTLA-4 and PD-1 (or its ligand PD-L1) have been found to be  
68 relatively successful in therapy to certain forms of solid cancer <sup>8,9</sup>. Similar to KIR and  
69 Ly49 molecules, checkpoint receptors can recruit and activate phosphatases (DOI:  
70 10.1126/sciadv.aay4458). Several studies have identified subsets of NK cells expressing  
71 CTLA-4 <sup>10</sup> and PD-1 <sup>11-14</sup> in various disease settings but also in healthy individuals <sup>15</sup>.  
72 Furthermore, there is accumulating evidence that NK cells participate in the therapeutic  
73 effects of antibodies against PD-1 or PD-L1, especially against tumors with low MHC-I  
74 expression <sup>11,12,16-21</sup>.

75

76 Recently PD-1 expression was detected early in the development of some ILC subsets,  
77 which was thought to play a role in the development of ILC responses and ILC subsets  
78 could be depleted with anti-PD-1 antibody<sup>22</sup>. These data raise the question of if and  
79 how PD1 is involved in NK cell development and education, and how a chronic lack of  
80 PD1 may affect NK cell functions. In the present study, we examined the role of PD-1  
81 in NK cell function using NK cells from *PD-1*-deficient mice as well as the potential  
82 role of PD-1/PD-L1 interactions in controlling NK cell activity.

83

84

85

86 **RESULTS**

87 **NK cell phenotype and population sizes are affected in *PD-1*<sup>-/-</sup> mice compared to**  
88 **wild-type mice**

89 Although PD-1 plays an important role in the development of ILCs<sup>22</sup>, no studies to date  
90 have examined the phenotype of NK cells from PD-1-deficient mice. Furthermore, lack  
91 of PD-1 has been shown to affect T and B cell development, as well as maturation<sup>23-26</sup>.  
92 When comparing the maturation status of NK cells from spleens of wildtype (WT) and  
93 *PD-1*<sup>-/-</sup> mice<sup>27</sup>, NK cells from *PD-1*<sup>-/-</sup> mice exhibited an increase in frequency of  
94 mature phenotype (CD11b<sup>+</sup>CD27<sup>-</sup>) NK cells (Figure 1a). This appears to take place at  
95 the expense of CD11b<sup>+</sup>CD27<sup>+</sup> NK cells as this subset was reduced in *PD-1*-deficient  
96 mice while the size of CD11b<sup>-</sup>CD27<sup>+</sup> NK cell populations was not affected (Figure 1a).  
97 In line with the fact that NK cells derived from *PD-1*-deficient mice exhibited a more  
98 mature phenotype, the frequency of KLRG1<sup>+</sup> NK cell subset<sup>28</sup> was also increased in  
99 *PD-1*-deficient mice compared to WT mice (Figure 1b). In addition, the frequency of  
100 CD62L, which is important for NK cell migration<sup>29</sup>, was reduced in NK cells derived  
101 from *PD-1*-deficient mice (Figure 1c).

102

103 It has recently been shown that PD-1 affects DNAM-1 expression on CD8 T cells<sup>30</sup>.  
104 We observed an increased frequency of DNAM-1<sup>high</sup> NK cells as well as increased  
105 expression levels of DNAM-1 in *PD-1*-deficient mice compared to WT mice (Figure  
106 1d). This confirms that PD-1 can modulate DNAM-1 expression not only on CD8 T  
107 cells but also on NK cells.

108

109 We further analyzed expression of the inhibitory receptors on the NK cells<sup>31</sup>, and  
110 compared the repertoire of inhibitory molecules on NK cells from WT and *PD-1*-  
111 deficient mice. We did not find any major differences in Ly49 and NKG2A expression

112 between these mice, apart from an increase in the NKG2A<sup>single</sup> population on NK cells  
113 from *PD-1*<sup>-/-</sup> mice (Figure 1e). The frequency of the activating Ly49D and Ly49H  
114 molecules was reduced in *PD-1*<sup>-/-</sup> mice, and this appeared to be due to a reduction in the  
115 frequency of the Ly49D<sup>+</sup>Ly49H<sup>+</sup> NK cell population (Figure 1f and g). The expression  
116 levels of other activating receptors for example NKG2D and CD244 were not  
117 significantly different between WT and *PD-1*-deficient mice (Supplemental Figure 1a-  
118 b).

119

120 Lack of PD-1 has been associated with the accumulation of exhausted T cells<sup>24</sup>. Lag3,  
121 CD39 and TIGIT are can be used as markers for T cell exhaustion<sup>24</sup>. Comparing the  
122 NK cells from WT and *PD-1*<sup>-/-</sup> mice, we observed only a small changes in the frequency  
123 of CD39<sup>+</sup> NK cells in *PD-1*<sup>-/-</sup> mice and the frequency of LAG3<sup>+</sup> NK cells  
124 (Supplemental Figure 1c-d). In addition, the surface expression of PD-L1, the ligand for  
125 PD-1, was not significantly different between the two mouse strains (Supplemental  
126 Figure 1e). In addition, we did not observe any difference in the expression of GITR,  
127 CXCR3 or CXCR4 (Supplemental Figure 1f-h).

128

129 We were concerned that some of the phenotypic changes that we observed on *PD-1*-  
130 deficient NK cells might be due to perturbations caused by T cells lacking PD-1<sup>32</sup>.  
131 Therefore we compared NK cells from *PD-1xRAG1*<sup>-/-</sup> and *RAG1*<sup>-/-</sup> mice since both these  
132 mice have neither T nor B cells. Similarly to T and B cell-competent mice, NK cell  
133 maturation was still skewed in *PD-1xRAG1*<sup>-/-</sup> mice with increased frequencies of  
134 CD11b<sup>+</sup>CD27<sup>-</sup> and KLRG1<sup>+</sup> NK cells compared to *RAG1*<sup>-/-</sup> mice (Supplemental Figure  
135 2a-b). However, we no longer observed any significant difference in the frequency of  
136 CD62L<sup>+</sup> NK cells between *RAG1*<sup>-/-</sup> and *PD-1xRAG1*<sup>-/-</sup> mice (Supplemental Figure 2c).

137 DNAM-1 expression levels were increased still on NK cells from *PD-1xRAG1*<sup>-/-</sup> mice  
138 but unlike in T and B cell competent mice, the frequency of CD39 expressing NK cells  
139 was increased in the *PD-1xRAG1*<sup>-/-</sup> mice (Supplemental Figure 2d and 2e). In contrast  
140 to the *PD-1*<sup>-/-</sup> mice, analysis of the expression levels of inhibitory receptors revealed no  
141 longer any difference in frequency of the NKG2A<sup>single</sup> NK cell population between  
142 *RAG1*<sup>-/-</sup> and *PD-1xRAG1*<sup>-/-</sup> mice (Supplemental Figure 2f).

143 While the frequency of Ly49D<sup>+</sup> NK cells was reduced in *PD-1xRAG1*<sup>-/-</sup> mice, there was  
144 no difference in Ly49H expression between *RAG1*<sup>-/-</sup> and *PD-1xRAG1*<sup>-/-</sup> mice. The  
145 reduction in the Ly49D population appeared to be occurring mostly in the  
146 Ly49D<sup>+</sup>Ly49H<sup>-</sup> subset and not in the Ly49D<sup>+</sup>Ly49H<sup>+</sup> population (Supplemental Figure  
147 2g and 2h).

148 In summary, we observed in mice lacking PD-1 increased NK cell maturation combined  
149 with higher DNAM-1, KLRG1 expression and reduced Ly49D expression.

150

### 151 **Elimination of MHC-I-deficient cells is impaired in *PD-1*<sup>-/-</sup> mice**

152 Chronic loss of PD-1 could potentially affect not only the phenotype of NK cells as  
153 outlined above, but also their function. The recognition and elimination of cells  
154 expressing reduced MHC-I levels is a hallmark of NK cell function and education<sup>33-35</sup>.

155 We therefore examined the ability of *PD-1*-deficient and WT mice to eradicate MHC-  
156 I<sup>neg</sup> spleen cells. We observed a significant reduction in the ability of *PD-1*<sup>-/-</sup> mice to  
157 eliminate MHC-I<sup>neg</sup> splenocytes compared to WT mice (Figure 2a). However this  
158 impairment was not at the level seen in *MHC-I*<sup>-/-</sup> mice, suggesting that NK cells might  
159 be affected by non-MHC-I factors such as increased maturity of NK cell populations as  
160 described above.

161

162 It has been previously demonstrated that anti-PD-1 treatment increases NK cell  
163 elimination of MHC-I<sup>neg</sup> PD-L1<sup>+</sup> tumors<sup>12</sup>. To determine if *PD-I*<sup>-/-</sup> mice also had  
164 reduced eradication of a MHC-I<sup>neg</sup> tumor with low expression of PD-L1<sup>12</sup>, mice were  
165 injected with an LD<sub>50</sub> dose of TAP-deficient RMA-S lymphoma cells. While the  
166 survival rate of WT mice was 45%, only 30% of *PD-I*-deficient mice survived (Figure  
167 2b). Comparison of tumor infiltrating NK cells from WT and *PD-I*<sup>-/-</sup> mice revealed a  
168 reduced frequency of tumor infiltration in *PD-I*-deficient mice (Figure 2c). PD-1 was  
169 heterogeneously expressed on NK cells infiltrating RMA-S in WT mice (Figure 2d),  
170 while splenic NK cells from the same mice exhibited little or no PD-1 expression  
171 (Figure 2e). While these findings are similar to previous studies<sup>12</sup>, the frequency of PD-  
172 1 expression on the NK cells from our study were significantly lower<sup>12</sup>.

173

174 Next, we examined tumor infiltrating NK cells from a second MHC-I<sup>low</sup> tumor cell line  
175 MTAP1A, which is a fibrosarcoma generated from the skin of a *Tap1*-deficient  
176 mouse<sup>36</sup>. MTAP1A has low expression of PD-L1, and does not express PD-L2  
177 (Supplemental Figure 3). Here again, we found reduced infiltration of NK cells in *PD-I*  
178 <sup>-/-</sup> mice but increased expression of PD-1 on tumor-infiltrating NK cells in WT mice  
179 compared to splenic NK cells (Fig. 2g-i and Supplemental Figure 4).

180

181 In addition, PD-1<sup>+</sup> tumor-infiltrating NK cells also displayed increased expression of  
182 KLRG1 compared to PD-1<sup>neg</sup> NK cells (Figure 2f and j). This was observed for tumor-  
183 infiltrating NK cells in both RMA-S and MTAP1A, and suggested that PD-1-expressing  
184 NK cells might have a more mature phenotype.

185

186 **Single cell RNA-seq reveals tissue-specific transcriptional imprinting of tumor**  
187 **infiltrating NK cells**

188



189 Since it has been suggested that NK cells may express PD-1 through trogocytosis<sup>37</sup> and  
190 since we observed differences in the phenotype of NK cells from WT and *PD-1*<sup>-/-</sup> mice,  
191 we performed single cell RNA-sequencing (scRNA-SEQ) using the SMART-SEQ2  
192 platform<sup>38</sup> on tumor-infiltrating NK cells from mice inoculated with the MTAP1A  
193 tumor. We chose MTAP1A over RMA-S since this tumor model gave consistently  
194 higher frequency of PD-1-expressing NK cells. SMART-SEQ2 libraries of sorted NK  
195 cells were generated from pooled tumors from either WT or PD-1-deficient mice  
196 (Supplemental Figure 5a-b). These libraries were filtered and a combined analysis was  
197 performed using Seurat v3<sup>39,40</sup> for a total of 371 WT and 375 *PD-1*<sup>-/-</sup> NK cells after  
198 quality control (Supplemental Figure 5c). Outliers expressing very few or very many  
199 genes were omitted, as were cells with a high frequency of apoptotic genes. Cells were  
200 clustered and projected using UMAP, which delineated five clusters with both WT and  
201 *PD-1*<sup>-/-</sup> NK cells found in all clusters although *PD-1*-deficient cells were over-  
202 represented in Clusters 3 and 4. (Figure 3a-c). Differentially expressed (DE) genes were  
203 deciphered between all clusters and the top 10 genes per cluster shown by heatmap  
204 (Supplemental Figure 6a). Selected genes were plotted using the Violin plot function  
205 revealing significantly over-expressed genes in each cluster. Within clusters 3 and 4, we  
206 could detect *Pdcd1* (PD-1) transcripts in both WT and *PD-1*<sup>-/-</sup> NK cell populations,  
207 suggesting an active upregulation of *Pdcd1* at the transcriptional level. (Figure 3d).  
208 Detection of *Pdcd1* transcript in *PD-1*<sup>-/-</sup> mice reflects that these mice do not have a  
209 complete gene defect but rather a deletion spanning exon 3 and exon 4 of the *Pdcd1*  
210 gene that prevents protein expression<sup>26</sup>. Our analysis highlighted the heterogeneity of *in*  
211 *vivo* NK responses with distinct patterns of *Prf1* and *Gzma*, *Gzmb* and *Gzmc* expression  
212 (Figure 3e). Interestingly, expression of the tissue residency marker *Cd69* was closely  
213 aligned with *Gzmc* detection (Figure 3e and g).

214

215 Clusters 3 and 4 were defined by a paucity of *Eomes* and *Irf8* whilst being enriched for  
216 expression of *Tnfrsf10* (TRAIL), *Cxcr6* and *Itgal* (CD49a) (Figure 3e-g). These clusters  
217 also had greater expression of *Amical* (JAML), *Ly6a*, *Il7r* and *Il21r* and lower levels of  
218 *Sell* (CD62L) (Figure 3g and Supplemental Figure 6b). Cells found in cluster 3 also had  
219 significantly enhanced *Lag3* levels suggesting this population may potentially harbor  
220 exhausted NK cells (Supplemental Figure 6b). Taken together these findings indicate  
221 that clusters 3 and 4 might represent a more mature/exhausted population and/or a  
222 tissue-resident-like subset of NK cells. Finally, we observed differential expression of  
223 transcripts for the inhibitory Ly49 genes *Klra1*, *Klra3*, *Klra7* and *Klra9* amongst the  
224 different clusters. In particular, *Klra3* (Ly49C) seemed to be present in cluster 3 but  
225 *Klra1* (Ly49A), *Klra7* (Ly49G2) and *Klra9* (*Ly49I*) seemed to be under-represented in  
226 the same cluster (Figure 3i). This indicated that different Ly49 subsets of NK cells in  
227 conjunction with PD-1 might play a role in the tumor environment as previously seen in  
228 other studies<sup>12</sup> (Figure 3i).

229

230 Comparison of all WT with all *PD-1*<sup>-/-</sup> NK cells independent of cluster identity  
231 determined a total of 54 genes that were significantly altered between these two NK cell  
232 populations (Figure 3j and supplemental table I). Amongst those over represented in  
233 *PD-1*<sup>-/-</sup> NK cells were transcripts for *Cd226* (encoding for DNAM-1), *Klrc1* (NKG2A)  
234 and *Klrg1*, which is very well in line with our flow cytometry data on spleen NK cells.  
235 Furthermore, we found that *PD-1*-deficient NK cells had altered levels of expression for  
236 *Cxcr6* and select members of both *Ly6* families, suggesting that NK cells from the *PD-*  
237 *I*<sup>-/-</sup> mice had a more tissue resident phenotype. *Ifng* and *Ccl4* transcripts were also more  
238 abundant in NK cells from *PD-1*<sup>-/-</sup> mice indicating an influence of PD-1 on *in vivo* NK  
239 cell responses (Figure 3j).

240

241 **PD-1 is induced on the surface of NK cells after stimulation with cytokines**

242 Since the expression profile of NK cells expressing PD-1 and CXCR6 suggested that  
243 they may be connected, we stimulated DX5<sup>+</sup>-enriched NK cells from WT mice with a  
244 combination of IL-12/15/18 cytokines for 96 hours, which has previously been shown to  
245 induce memory NK cells<sup>41</sup> as well as CXCR6 on the surface of NK cells<sup>42</sup>. This  
246 cytokine stimulation resulted in approximately 10% of WT NK cells expressing PD-1  
247 (Figure 4a). Similar patterns of staining were seen in cytokine-stimulated NK cells from  
248 *RAG1*<sup>-/-</sup> mice (Figure 4b), which ruled out that expression of PD-1 might be on a T cell  
249 subset with low CD3 expression, that T cells could induce PD-1 on NK cells or that PD-  
250 1 expression was through trogocytosis from T cells.

251

252 We have previously demonstrated that we could define functional NK cell subsets based  
253 on DNAM-1 and NKG2A expression<sup>43</sup>. Therefore, we here investigated whether PD-1  
254 expression was confined to a specific NK cell subtype following cytokine stimulation.  
255 We assessed the expression of PD-1 on DNAM-1<sup>+</sup>NKG2A<sup>+</sup>, DNAM-1<sup>+</sup>NKG2A<sup>-</sup>,  
256 DNAM-1<sup>-</sup>NKG2A<sup>+</sup> and DNAM-1<sup>-</sup>NKG2A<sup>-</sup> NK cell subsets. Although we did not  
257 observe any significant difference in the percentage of PD-1<sup>+</sup> NK cells between these  
258 subsets, DNAM-1<sup>+</sup> NK cells had on average an increased percentage of PD-1  
259 expressing NK cells following cytokine stimulation (Figure 4c).

260

261 Since the intratumoral NK cells from *PD-1*<sup>-/-</sup> mice exhibited a trend towards expressing  
262 more IFN $\gamma$ , we examined the intracellular levels of IFN $\gamma$  in the IL-12/15/18 cytokine  
263 stimulated NK cells. We found increased levels of intracellular IFN $\gamma$  in the *PD-1*<sup>-/-</sup> NK  
264 cells compared to NK cells from WT mice (Figure 4d), confirming that lack of PD-1  
265 might predispose NK cells to increased IFN $\gamma$  expression. Furthermore, we also found  
266 that CXCR6 levels were increased on the surface of NK cells from *PD-1*<sup>-/-</sup> mice

267 following cytokine stimulation, suggesting a role for PD-1 in controlling the expression  
268 CXCR6 (Fig 4e).

### 269 **PD-1 can form *cis* interactions with PD-L1 on NK cells**

270 The tumor cells used in our experiments had little or no PD-L1 expression. Therefore,  
271 our observations that the PD-1 expressing cells is increased on intratumoral NK cells  
272 and IL-12/15/18 stimulated NK cells might mean that PD-L1 could interact with PD-1  
273 on NK cells both in *cis* or *trans*. It has been shown previously that inhibitory MHC-  
274 class I binding molecules on NK cells could form *cis*-interactions with their ligands  
275 <sup>44,45</sup>. Furthermore, PD-1 and PD-L1 have recently been shown to form *cis*-interactions  
276 in artificial lipid structures and in antigen-presenting cells (APCs) <sup>46</sup>. We therefore  
277 assessed whether the movement of PD-L1 was restricted in the presence of PD-1 and  
278 determined PD-L1 diffusion on the membranes of NK cells lacking PD-1 compared to  
279 WT NK cells using fluorescence correlation spectroscopy (FCS), a method that detects  
280 diffusion of molecules and has previously been used to measure the diffusion of  
281 receptors in the membrane of NK cells <sup>45,47</sup>. FCS measurements were performed on the  
282 cell membrane, and a series of autocorrelation curves were generated and fitted to the  
283 2D diffusion FCS curve fitting equation. Representative autocorrelation curves with 2D  
284 curve fit are shown in Figure 5a. Interestingly, PD-L1 diffused significantly faster on  
285 the membrane of NK cells lacking PD-1, compared to PD-1<sup>+</sup> NK cells from WT mice  
286 (Figure 5a and b). Furthermore, we observed a trend for high levels of PD-L1  
287 molecules per  $\mu\text{m}^2$  on the surface of NK cells lacking PD-1 (Figure 5c). Since molecule  
288 crowding factor is ruled out on PD-1<sup>+</sup> NK cells, the slow diffusion of PD-L1 molecules  
289 on cell membrane can be due to specific interactions or clustering. To investigate  
290 whether PD-1 and PD-L1 form clusters on the surface of NK cells, the brightness of  
291 PD-L1 was quantified that is measured in terms of counts per molecule, diffusing within  
292 the observation volume. We observed a tendency towards larger clusters, as the

293 brightness of PD-L1 on PD-1 positive NK cells was higher compared to *PD-1*<sup>-/-</sup> NK  
294 cells (Figure 5d). These data suggest that the PD-L1 on PD-1<sup>+</sup> NK cells clusters with  
295 PD-1, indicating *cis* interactions on the membrane of NK cells. In conclusion, the PD-  
296 L1 diffusion faster without any hinders on *PD-1*<sup>-/-</sup> NK cells whereas in presence of PD-  
297 1 on cell membrane PD-L1 diffuse slower, this suggest that PD-L1 might be clustering  
298 in *cis* with PD-1 on the cell membrane (Figure 5e).

299

300 Three-dimensional molecular models of the full-length extracellular domains of PD-1  
301 and PD-L1 reveal that their structural features easily allow for the formation of *cis*-  
302 interactions. Indeed, a model of the stalk region of PD-1 (comprising the stretch of  
303 residues R147-V170) in extended conformation demonstrates that its length is sufficient  
304 to allow both *cis*- and *trans*-interactions with the N-terminal domain of PD-L1 (Figure  
305 6). Our molecular models thus suggest a binding in which PD-1 “tip-toes” to reach PD-  
306 L1 with an extended stalk, while keeping the same PD-1/PD-L1 “cheek-to-cheek”  
307 interface found in previous crystal structures (Figure 6).

308

309

310 **DISCUSSION**

311 Expression of PD-1 on NK cells has been observed in many human and mouse  
312 studies<sup>11,12,14,16,32,48-50</sup>. However, some recent studies suggested that NK cells do not  
313 express PD-1 and expression may due to artifact of flow cytometry staining or through  
314 interactions with PD-L1 and the NK cells acquiring PD-1 via trogocytosis<sup>37</sup>. However  
315 in the present study we could find transcript and surface expression of PD-1 in tumor  
316 infiltrating NK cells, as well as upon IL-12/15/18 stimulation of NK cells in culture.  
317 Furthermore, we also found that PD-1 was induced on tumor-infiltrating NK cells even  
318 though the tumors used in our study expressed little or no PD-L1. NK cells from mice  
319 lacking PD-1 displayed phenotypic differences compared to NK cells from WT mice,  
320 suggesting that background low levels of PD-1 might still play a role in NK cell  
321 homeostasis or in NK cell development. In particular, NK cells from *PD-1*-deficient  
322 mice exhibited increased maturation as well as increase in expression of CD226.

323

324 We found that *PD-1*-deficient mice were poor at rejecting MHC-I<sup>-/-</sup> cells and had low  
325 NK cell infiltration into tumors expressing low levels of MHC-I *in vivo*. In part, this  
326 might be due to the increased maturity of NK cells in *PD-1*-deficient mice, but the  
327 reduced frequency of tumor infiltrating NK cells could also be due to (i) reduced  
328 CD62L found on the PD-1<sup>-/-</sup> NK cells or (ii) reduced survival once these NK cells  
329 encounter tumor cells. It is unclear if the increased NK cell maturation is a direct effect  
330 on NK cells since we observe very little or no PD-1 on NK cells in circulation.  
331 However, others have shown that lack of PD-1 on dendritic cells leads to increased IL-  
332 12 and TNF production by dendritic cells<sup>51</sup>. Thus lack of PD-1 on DCs could indirectly  
333 affect NK cell maturation. Furthermore, absence of PD-1 on T and B cells could affect  
334 NK cells indirectly as well<sup>52,53</sup>. For this reason, we crossed *PD-1*-deficient mice to  
335 mice deficient in *RAG1*. In the *PD-1xRAG1*<sup>-/-</sup> mice, we still had more mature NK cells

336 and increased expression of DNAM-1 suggesting that the *PD-1*<sup>-/-</sup> T and B cells had little  
337 effect on the NK cell phenotype. *PD-1*<sup>-/-</sup> NK cells stimulated with IL-12/15/18 had  
338 increased numbers of IFN $\gamma$ -producing cells suggesting that increased IL-12 from  
339 accessory cells in *PD-1*<sup>-/-</sup> mice<sup>51</sup> might already prime NK cells to make more IFN $\gamma$ .  
340 Chronic infection and IL-18 expression have previously been associated with higher  
341 expression of PD-1 on NK cells<sup>32,50,54,55</sup>. Even though PD-1 expression on T cells has  
342 been associated with exhaustion, it is more likely that it is also a marker for activation  
343 and that its expression controls T cells from being overly activated<sup>24,56</sup>. Thus, PD-1  
344 expression on NK cells might play a similar role within the frame of NK cell activation.

345

346 A recent study has also called into question whether PD-1 is actually expressed at all on  
347 NK cells<sup>37</sup>. Our results are in agreement with some of these findings, including the low  
348 expression of PD-1 on NK cells under normal conditions. However, in contrast to the  
349 study of Judge *et al* which used IL-2-stimulated NK cells to investigate PD-1  
350 expression on NK cells<sup>37</sup>, we established here that the combination of IL-12, IL-15 and  
351 IL-18 leads to PD-1 expression, which is in line with previous publications<sup>13,57,58</sup>.  
352 Furthermore, we did not see much expression of PD-1 on splenocytes but we could see  
353 that there was clear expression of PD-1 on tumor infiltrating particularly since we used  
354 *PD-1*-deficient mice as controls. When comparing our two tumor models, PD-1  
355 expression on NK cells seemed to be highest when infiltrating the MTAP1A tumors  
356 rather than RMA-S. The MTAP1A tumor was generated by painting the skin with  
357 methylcholanthrene whereas RMA-S is lymphoma. Therefore, the tumor  
358 microenvironment (TME) within these tumors might determine the level of expression  
359 of PD-1. For example, fibrotic tumors have been associated with TGF- $\beta$ <sup>59</sup> and TGF- $\beta$   
360 itself can induce PD-1 expression on T cells<sup>60</sup>. This suggests that the microenvironment  
361 surrounding NK cells could lead to PD-1 expression. Metzger *et al.* have also suggested

362 that false positives can be obtained by anti-PD-1 antibodies binding to nuclear antigen  
363 in dying cells<sup>61</sup>. In our studies, we have compared our staining of WT NK cells with  
364 NK cells from *PD-1<sup>-/-</sup>* mice and did not see non-specific binding using the anti-PD-1  
365 antibody clone RMP1-14 nor clone 29F.1A12. We did not use the J43 clone in our  
366 studies as we had previously found some non-specific binding with this clone. This  
367 suggested that at least in our hands, our observed PD-1 expression was not due to cross-  
368 reactivity with another antigen. Finally, since PD-1 is expressed on other tumor-  
369 infiltrating cells, there is still the possibility that PD-1 may be transferred by  
370 trogocytosis from surrounding cells to NK cells via PD-L1. We cannot rule this out but  
371 since we see PD-1 expression by mRNA from NK cells, this probably suggests that the  
372 observed increase in PD-1 expressing NK cells is at least in part through induction of  
373 PD-1.

374

375 NK cells play an important role in clearance of tumor cells, and impairment of NK cell  
376 functions results in an increased risk for the development of cancer. Both tumor-  
377 infiltrating NK cells (TINKs) and tumor-associated NK cells (TANKs) have been  
378 described<sup>62</sup>, but their function and expression profiles have yet to be defined. Our single  
379 cell gene expression data reveal that NK cells within the tumor microenvironment  
380 (TME) separate into five distinct clusters. Many DE genes of our intra-tumoral NK cells  
381 have been previously described in tissue resident NK cells in different organs including  
382 liver, lung, lymph node and placenta. The high expression of tissue residency markers  
383 in NK cells within the TME could indicate that these NK cells are tumor tissue resident.  
384 Whether these NK cells infiltrate tumors (TINKs) to eliminate them, or whether they  
385 associate with tumor cells (TANKs) and facilitate pro-angiogenic properties, remains  
386 difficult to assess. In many tumors, TINKs exhibit a profoundly altered phenotype with  
387 defects in degranulation and IFN $\gamma$  expression<sup>63</sup>. It is still unclear whether PD-1 on NK



388 cells leads to exhaustion and functional impairment, or if expression of PD-1 restricts  
389 NK cell activation to prevent the exhausted phenotype, as has been suggested for T  
390 cells<sup>24,48</sup>.

391

392 Previous work has established the bidirectional signaling of PD-1 and PD-L1. *Cis*  
393 interactions between PD-1 and PD-L1 on antigen presenting cells have been shown to  
394 decrease availability of PD-L1 for *trans* binding to PD-1 on T cells, and both *cis* and  
395 *trans* interactions are susceptible to antibody blockade<sup>46</sup>. In the current study, we have  
396 shown that *cis* interaction between PD-1 and PD-L1 and a potential sequestration of  
397 available PD-1 for *trans* signaling also occurs on NK cells. We show that in the absence  
398 of PD-1, the diffusion rate of PD-L1 is significantly increased, while the size of PD-L1  
399 clusters is decreased, indicating that PD-L1 forms clusters with PD-1 on the same  
400 membrane, thus limiting the movement of PD-L1 and potentially also that of PD-1. This  
401 suggests that the levels of PD-L1 on NK cells can determine their response to PD-1  
402 signaling imposed by PD-L1<sup>+</sup> cells inside the tumor microenvironment. We further  
403 provide a model for how PD-1 and PD-L1 interact in *trans* and in *cis*, where the same  
404 amino acid residues are involved in these interactions.

405

406 The binary PD-1/PD-L1 complex was crystallized both for human PD-L1 and murine  
407 PD-1<sup>64</sup> and for human PD-L1 and human PD-1<sup>65</sup>. In both cases, protein-protein  
408 binding occurs via “cheek to cheek interaction” of Ig domains of PD-1 and PD-L1, and  
409 this was almost identical in the two structures. We hypothesize that the long flexible  
410 stalk of PD-1 allows both *cis* and *trans* interaction, where PD-1 “tip-toes” to reach PD-  
411 L1 with an extended stalk, while keeping the same PD-1/PD-L1 “cheek-to-cheek”  
412 interface found in the crystal structures. The stalk region of PD-1 (residues R147-V170)  
413 was modelled in extended conformation to demonstrate that its length is sufficient to

414 allow both *cis*- and *trans*-interaction with the N-terminal domain of PD-L1. High  
415 sequence homology between murine and human proteins (77% for the PD-L1 and 64%  
416 for PD-1) and conservation of the residues forming intermolecular hydrogen bonds  
417 suggest that the *cis* and *trans*-interaction for the PD-1 and PD-L1 could be possible for  
418 the human cells as well. Indeed, *cis* binding of human PD-1 and human PD-L1 has  
419 recently been demonstrated <sup>46</sup>.

420

421 A recent study has shown that NK cells up-regulate PD-L1 in response to IFN- $\gamma$  and  
422 that NK cells from AML patients show increased expression of PD-L1 <sup>66</sup>. PD-L1<sup>+</sup> cells  
423 in the TME negatively regulate PD-1<sup>+</sup> effector cells, but at the same time, PD-L1 on T  
424 and NK cells might inhibit survival of PD-1<sup>+</sup> APCs <sup>67</sup>. In addition to binding PD-1 in  
425 *cis*, PD-L1 can also bind to CD80 on the same membrane, which may repress both PD-  
426 1 and CTLA-4 signaling while favouring the CD28 axis <sup>68</sup>. These multi-facetted binding  
427 patterns in *trans* and *cis* may contribute to the fine tuning of the immune response  
428 within the TME, and may be the cause for the differences observed when treating  
429 cancer patients with anti-PD-1 vs. anti-PD-L1 blocking antibodies <sup>69</sup>.

430

431 Antibody immunotherapy against PD-1 or its ligands has emerged as one of the  
432 breakthrough immunotherapies in the clinics <sup>70</sup>. PD-1 was expressed on NK cells in a  
433 number of clinical studies examining patients with different cancers <sup>11,14,15,49</sup>. NK cells  
434 expressing PD-1 in human cancers appear to be confined to more mature NK cells <sup>15</sup>.  
435 However no data exists on the effects of anti-PD-1/PD-L1 therapy has on NK cell  
436 function and development. Within the mouse NK cells, we did not find to date a specific  
437 NK cell population/subset that expressed PD-1. However it may well be that anti-PD-1  
438 therapy does not only affect adaptive cells and also innate cells that would have  
439 potential knock-on effects on adaptive immune-responses <sup>71</sup>.

440

441

442 **MATERIAL AND METHODS (977 words)**

443 **Mice**

444 C57BL/6, *PDCD-1*(PD-1)<sup>-/-</sup> (generously provided Dr. Tasuku Honjo, Kyoto University,  
445 Kyoto, Japan)<sup>26</sup>, *RAG1*<sup>-/-72</sup> and *PD-1*<sup>-/-</sup>x*RAG1*<sup>-/-</sup> (PD-1xRAG1<sup>-/-</sup>)<sup>73</sup>, *H-2K<sup>b</sup>*x*H-2D<sup>b</sup>*<sup>-/-</sup>  
446 (MHC-I<sup>-/-</sup>)<sup>74</sup> mice on the C57BL/6 background were housed under specific pathogen  
447 free conditions at the Department of Microbiology, Tumor and Cell Biology and Astrid  
448 Fagraeus Laboratories, Karolinska Institutet, Stockholm. All procedures were  
449 performed under both institutional and national guidelines (Ethical numbers from  
450 Stockholm County Council N147/15). Sex and aged match mice were used for all  
451 experiments. Mice were chosen randomly for control or treated groups.

452

453 **Tumors**

454 MHC-I-deficient lymphomas RMA-S (*TAP2*-deficient), and *TAP1*-deficient MCA  
455 fibrosarcoma (clone MTAP1A) have been previously described<sup>6,36</sup>. RMA-S cells were  
456 inoculated at the LD<sub>50</sub> dose of 10<sup>5</sup> s.c. in the flank of mice. MTAP1A was inoculated at  
457 a dose of 10<sup>5</sup> cells/mouse. Tumor growth was measured every two days and mice were  
458 sacrificed when the tumor reached 10<sup>3</sup> mm.

459

460 **NK cell purification and culture**

461 Single-cell suspension from spleens was depleted of erythrocytes, and NK cells were  
462 positively sorted using anti-DX5<sup>+</sup> magnetic beads or by negative sorting using MACS  
463 separation, according to the manufacturer's instructions (Miltenyi Biotec, Bergisch  
464 Gladbach, Germany). Cells were resuspended in complete medium ( $\alpha$ MEM; 10 mM  
465 HEPES, 2 × 10<sup>-5</sup> M 2-ME, 10% FCS, 100 U/ml penicillin, 100 U/ml streptomycin) with  
466 with 100 ng/ml mouse IL-12 (PeproTech), IL-15 (Immunotools) and 100 ng mouse IL-  
467 18 (MBL International, Woburn, MA, USA) for 4 days. For isolation of NK cell

468 subsets, NK cells were isolated as above and then sorted on MoFlo XDP cell sorter  
469 (Beckman Coulter, Brea, CA, USA).

470

#### 471 **In vivo rejection assay**

472 Splenocytes from B6 or MHC-I<sup>-/-</sup> mice were labeled with 0.5 μM CFSE (target cells) or  
473 0.5 μM CellTrace Violet (control cells; Thermo Fisher Scientific Life Sciences) for 10  
474 min. Target and control cells were washed, then mixed and 1–3 × 10<sup>6</sup> cells coinjected  
475 intravenously via the tail vein into B6, PD-1<sup>-/-</sup> mice or MHC-I<sup>-/-</sup> mice as controls for  
476 NK cell-mediated killing. The injection mix was analyzed by flow cytometry for  
477 reference. Two days later, the spleens were harvested and erythrocytes depleted, and the  
478 relative percentages of target and control cells were measured by flow cytometry<sup>31</sup>.  
479 Rejection was estimated as the relative survival of target or cells, calculated as: %  
480 remaining target cells of labeled cells/% target cells in inoculate or % remaining control  
481 cells of labeled cells/% control cells in inoculate.

482

#### 483 **Antibodies and Flow Cytometry**

484 Antibodies used in the study were purchased from BD, Biolegend or eBioscience.  
485 Clones for the different antibodies were: anti-NK1.1 (clone PK136 Biolegend), -NKp46  
486 (29A1.4), -PD-1 (RMP1-14 and 29F.1A12), -NKG2A (20d5 Biolegend), Ly49A  
487 (YEI/48 BD) Biolegend), Ly49C (5E6), Ly49D (4E5), Ly49G2 (4D11), Ly49H (3D10  
488 eBioscience), Ly49I (YLI-90, eBioscience) -CD11b (clone M1/70, BioLegend), -  
489 CD127 (clone A7R34, BioLegend), -GITR (DTA-1, Biolegend), -CD244  
490 (m2B4(B6)458.1), -TIGIT (GIGD7, eBioscience), CD39 (Duha59, Biolegend), -  
491 KLRG1 (clone MAFA, Biolegend), -CD226 (10E5, Biolegend), -GR1 (GR1,  
492 Biolegend), -CXCR3 (CXCR3-173 eBioscience), -CXCR4 (clone L276F12 Biolegend)

493 -CD274 (clone MIH1, Biolegend). The 4LO3311 (Ly49C) hybridoma was a kind gift  
494 from Suzanne Lemieux.

495 Flow cytometry was performed on CyAN ADP LX 9-colour flow cytometer (Beckman  
496 Coulter, Pasadena, CA) or LSRII (Becton Dickinson). Data were analyzed using  
497 FlowJo software (Tree Star Inc, OR).

498

#### 499 **Molecular modelling of cis- and trans-interactions between PD-1 and PD-L1**

500 Three-dimensional molecular models of the full-length extracellular regions of murine  
501 or human PD-1/PD-L1 complexes (PD-L1 residues 19-239 and PD-1 residues 21-170)  
502 were created based on the crystal structure of the chimeric complex of human PD-L1  
503 and murine PD-1 (pdb code3BIK)<sup>64</sup>. To our knowledge, no crystal structure of murine  
504 PD-L1 has been determined yet, although several crystal structures of human PD-L1 are  
505 available<sup>64,75</sup>. The crystal structure of human PD-L1 revealed that it consists of two Ig  
506 domains linked by a 10 residues-long stalk region. The sequence identity between  
507 murine and human PD-L1 is 77%, which means that their 3D structures may be very  
508 similar. Indeed, the model of murine PD-L1 created using SwissModel<sup>76</sup> is very similar  
509 to human PD-L1. Replacement of human PD-L1 with its murine orthologue in the 3BIK  
510 structure allowed us to generate a full-length model of the murine PD-1/PD-L1  
511 complex. Conversely, replacement of murine PD-1 with the human orthologue allowed  
512 us to create a three-dimensional model of the full-length human PD-1/PD-L1 complex.  
513 The stalk regions of PD-1 (residues 147-170) and PD-L1 (residues 229-239) were  
514 modelled in an arbitrary extended conformation using the program Coot<sup>77</sup> followed by  
515 model regularization to improve the geometry of the peptide chain and remove all  
516 possible sterical clashes.

517

#### 518 **SMART-SEQ2**

519 scRNA-Seq was performed in 384-well format. The tumors were isolated, rapidly  
520 processed, stained for a panel of surface markers and single cell sorted within  
521 approximately 90 minutes of organ harvest. In total 382 NK cells were sorted directly  
522 into 2  $\mu$ l lysis buffer using a BD Influx from pooled tumors from either 3 WT and 3 PD-  
523 1<sup>-/-</sup> KO mouse respectively. SMART-Seq2 libraries were prepared using the method  
524 described in Picelli et al.<sup>38</sup> by the Eukaryotic Single Cell Genomics national facility at  
525 SciLife Laboratory, Stockholm.

526

527 Digital gene expression matrices were preprocessed and filtered using the Seurat v3.0 R  
528 package (<https://github.com/satijalab/seurat> ). Outlier cells were first identified based on  
529 3 metrics (library size, number of expressed genes, etc). Low abundance genes were  
530 removed by removing all genes that were expressed in less than 3 cells. The raw counts  
531 were normalized and transformed using the ‘LogNormalize’ function of Seurat. Highly  
532 variable genes were detected using the proposed workflow of the Seurat R package.  
533 Unsupervised clustering of the cells was performed and visualized in two-dimensional  
534 scatterplots via Uniform Manifold Projection (UMAP) function using the Seurat R  
535 package.

536

### 537 **Microscopy and FCS analysis**

#### 538 *Diffusion of PD1 and PDL1 on cell surface*

539 Zeiss 510 microscope with a Confocor 3 system (Carl Zeiss Microimaging GmbH), C-  
540 Apochromat 40x/1.2 NA water objective was used for Fluorescence Correlation  
541 Spectroscopy (FCS) measurements<sup>78</sup>. Diffusion of interested molecules were measured  
542 using fluorescent labelled antibodies and FCS measurements were calibrated by  
543 measuring Alexa-488 and Alexa-647 dyes in solution at different power scale  
544 concentration whose diffusion coefficient is known. For cell preparation, spleens were

545 isolated from from *RAG1*<sup>-/-</sup> and *PD-1xRAG1*<sup>-/-</sup> mice. From single cell suspension of  
546 splenocytes of mice, NK cells were isolated by MACS NK cell isolation kit mouse II  
547 (Miltenyi Biotech Norden AB, Sweden). NK cells were stained for PD-1-Alexa flour  
548 488 and PD-L1-Alexa flour 647, and microscopic chambers were coated with poly-L-  
549 lysine , so the cells are made to attach to the glass surface <sup>45,79</sup>. All the FCS  
550 measurements on cells were made on the cell surface for the diffusion of PD-1 and PD-  
551 L1.

552

### 553 *FCS analysis*

554 FCS Data was analyzed using MATLAB based written algorithm to have graphical user  
555 interface (GUI) for fitting. GUI permits to assume the initial fit coefficient like N-  
556 number of molecules, Tau D-Diffusion time for the molecule to diffuse within the focal  
557 volume, triplet state of the molecules. Different fit models and time fit domain was  
558 considered for free dyes and cells. Where 3D diffusion model fit was chosen for free  
559 dyes with time domain fit 0.5 μsecond to 0.1 msecond and 2D diffusion model fit for  
560 cells with time fit between 1 millisecond to 5 second.

561

### 562 **Statistical analyses**

563 All statistical analysis was performed using GraphPad Prism software (La Jolla, CA).

564

565



566 **Data availability:** Smart-Seq2 data will be made available at upon acceptance. Other  
567 data is available from the corresponding author upon reasonable request.

568

569 **Author Contributions:** Conceptualization: A.K.W., N.K., C.T., B.J.C.; methodology:  
570 A.K.W., N.K., C.T., S.B.S., P.R., T.S., A.A., K.K., B.J.C; Data collection: A.K.W.,  
571 N.K., C.T., K.v.d.V., S.B.S., D.O., E.LG., N.C., S.T., T.S., B.J.C;; Analysis and  
572 interpretation: A.K.W., N.K., C.T., K.v.d.V., S.B.S., D.O., E.LG., N.C., S.T., P.R., T.S.,  
573 A.A., K.K., B.J.C.; writing - original draft preparation, A.K.W., C.T. T.S., B.J.C.;  
574 critical revision of the article: A.K.W., N.K., A.A., K.K., B.J.C., visualization,  
575 A.K.W.,C.T., S.B.S., T.S., B.J.C; funding acquisition, K.K. and B.J.C.; All authors have  
576 read and agreed to the published version of the manuscript.

577

578 **Conflicts of Interest:** The authors declare no conflict of interest.

579

580 **Acknowledgement:** ScRNA-seq was performed at the eukaryotic single-cell genomics  
581 facility at SciLife laboratories (Stockholm, Sweden). The data handling was enabled by  
582 resources provided by the Swedish National Infrastructure for Computing (SNIC) at  
583 Uppsala partially funded by the Swedish Research Council through grant agreement no.  
584 2018-05973. We also thank Jonas S ndergaard for advice regarding the scRNA-seq  
585 analyses.

586

587

588

589

590 **REFERENCES**

591

- 592 1 Kiessling, R., Klein, E., Pross, H. & Wigzell, H. "Natural" killer cells in  
593 the mouse. II. Cytotoxic cells with specificity for mouse Moloney  
594 leukemia cells. Characteristics of the killer cell. *European journal of*  
595 *immunology* **5**, 117-121, doi:10.1002/eji.1830050209 (1975).
- 596 2 Herberman, R. B., Nunn, M. E., Holden, H. T. & Lavrin, D. H. Natural  
597 cytotoxic reactivity of mouse lymphoid cells against syngeneic and  
598 allogeneic tumors. II. Characterization of effector cells. *Int J Cancer* **16**,  
599 230-239 (1975).
- 600 3 Biron, C. A. Natural killer cell regulation during viral infection. *Biochem*  
601 *Soc Trans* **25**, 687-690 (1997).
- 602 4 Kadri, N. *et al.* Dynamic Regulation of NK Cell Responsiveness. *Curr*  
603 *Top Microbiol Immunol* **395**, 95-114, doi:10.1007/82\_2015\_485 (2016).
- 604 5 Lanier, L. L. NK cell recognition. *Annu Rev Immunol* **23**, 225-274,  
605 doi:10.1146/annurev.immunol.23.021704.115526 (2005).
- 606 6 Karre, K., Ljunggren, H. G., Piontek, G. & Kiessling, R. Selective  
607 rejection of H-2-deficient lymphoma variants suggests alternative  
608 immune defence strategy. *Nature* **319**, 675-678, doi:10.1038/319675a0  
609 (1986).
- 610 7 Lanier, L. L. Up on the tightrope: natural killer cell activation and  
611 inhibition. *Nat Immunol* **9**, 495-502, doi:10.1038/ni1581 (2008).
- 612 8 Seidel, J. A., Otsuka, A. & Kabashima, K. Anti-PD-1 and Anti-CTLA-4  
613 Therapies in Cancer: Mechanisms of Action, Efficacy, and Limitations.  
614 *Front Oncol* **8**, 86, doi:10.3389/fonc.2018.00086 (2018).
- 615 9 Pardoll, D. M. The blockade of immune checkpoints in cancer  
616 immunotherapy. *Nature reviews. Cancer* **12**, 252-264,  
617 doi:10.1038/nrc3239 (2012).
- 618 10 Stojanovic, A., Fiegler, N., Brunner-Weinzierl, M. & Cerwenka, A.  
619 CTLA-4 is expressed by activated mouse NK cells and inhibits NK Cell  
620 IFN-gamma production in response to mature dendritic cells. *J Immunol*  
621 **192**, 4184-4191, doi:10.4049/jimmunol.1302091 (2014).
- 622 11 Benson, D. M., Jr. *et al.* The PD-1 / PD-L1 axis modulates the natural  
623 killer cell versus multiple myeloma effect: a therapeutic target for CT-  
624 011, a novel, monoclonal anti-PD-1 antibody. *Blood*, doi:blood-2010-02-  
625 271874 [pii]  
626 10.1182/blood-2010-02-271874 (2010).
- 627 12 Hsu, J. *et al.* Contribution of NK cells to immunotherapy mediated by  
628 PD-1/PD-L1 blockade. *J Clin Invest* **128**, 4654-4668,  
629 doi:10.1172/JCI99317 (2018).
- 630 13 Quatrini, L. *et al.* Endogenous glucocorticoids control host resistance to  
631 viral infection through the tissue-specific regulation of PD-1 expression  
632 on NK cells. *Nat Immunol* **19**, 954-962, doi:10.1038/s41590-018-0185-0  
633 (2018).
- 634 14 Beldi-Ferchiou, A. *et al.* PD-1 mediates functional exhaustion of  
635 activated NK cells in patients with Kaposi sarcoma. *Oncotarget* **7**,  
636 72961-72977, doi:10.18632/oncotarget.12150 (2016).
- 637 15 Pesce, S. *et al.* Identification of a subset of human natural killer cells  
638 expressing high levels of programmed death 1: A phenotypic and

- 639 functional characterization. *J Allergy Clin Immunol* **139**, 335-346 e333,  
640 doi:10.1016/j.jaci.2016.04.025 (2017).
- 641 16 Guo, Y. *et al.* PD1 blockade enhances cytotoxicity of in vitro expanded  
642 natural killer cells towards myeloma cells. *Oncotarget* **7**, 48360-48374,  
643 doi:10.18632/oncotarget.10235 (2016).
- 644 17 Bezman, N. A. *et al.* PD-1 blockade enhances elotuzumab efficacy in  
645 mouse tumor models. *Blood Adv* **1**, 753-765,  
646 doi:10.1182/bloodadvances.2017004382 (2017).
- 647 18 Huang, Y. *et al.* PD-1 blocks lytic granule polarization with concomitant  
648 impairment of integrin outside-in signaling in the natural killer cell  
649 immunological synapse. *J Allergy Clin Immunol* **142**, 1311-1321 e1318,  
650 doi:10.1016/j.jaci.2018.02.050 (2018).
- 651 19 Liu, Y. *et al.* Increased expression of programmed cell death protein 1 on  
652 NK cells inhibits NK-cell-mediated anti-tumor function and indicates  
653 poor prognosis in digestive cancers. *Oncogene* **36**, 6143-6153,  
654 doi:10.1038/onc.2017.209 (2017).
- 655 20 Seo, H. *et al.* IL21 Therapy Combined with PD-1 and Tim-3 Blockade  
656 Provides Enhanced NK Cell Antitumor Activity against MHC Class I-  
657 Deficient Tumors. *Cancer Immunol Res* **6**, 685-695, doi:10.1158/2326-  
658 6066.CIR-17-0708 (2018).
- 659 21 Ansell, S. M. *et al.* PD-1 blockade with nivolumab in relapsed or  
660 refractory Hodgkin's lymphoma. *N Engl J Med* **372**, 311-319,  
661 doi:10.1056/NEJMoa1411087 (2015).
- 662 22 Yu, Y. *et al.* Single-cell RNA-seq identifies a PD-1hi ILC progenitor and  
663 defines its development pathway. *Nature* **539**, 102-106,  
664 doi:10.1038/nature20105 (2016).
- 665 23 Ahn, E. *et al.* Role of PD-1 during effector CD8 T cell differentiation.  
666 *Proc Natl Acad Sci U S A* **115**, 4749-4754,  
667 doi:10.1073/pnas.1718217115 (2018).
- 668 24 Odorizzi, P. M., Pauken, K. E., Paley, M. A., Sharpe, A. & Wherry, E. J.  
669 Genetic absence of PD-1 promotes accumulation of terminally  
670 differentiated exhausted CD8+ T cells. *J Exp Med* **212**, 1125-1137,  
671 doi:10.1084/jem.20142237 (2015).
- 672 25 Good-Jacobson, K. L. *et al.* PD-1 regulates germinal center B cell  
673 survival and the formation and affinity of long-lived plasma cells. *Nat*  
674 *Immunol* **11**, 535-542, doi:10.1038/ni.1877 (2010).
- 675 26 Nishimura, H., Minato, N., Nakano, T. & Honjo, T. Immunological  
676 studies on PD-1 deficient mice: implication of PD-1 as a negative  
677 regulator for B cell responses. *Int Immunol* **10**, 1563-1572 (1998).
- 678 27 Hayakawa, Y. & Smyth, M. J. CD27 dissects mature NK cells into two  
679 subsets with distinct responsiveness and migratory capacity. *J Immunol*  
680 **176**, 1517-1524 (2006).
- 681 28 Huntington, N. D. *et al.* NK cell maturation and peripheral homeostasis  
682 is associated with KLRG1 up-regulation. *J Immunol* **178**, 4764-4770,  
683 doi:10.4049/jimmunol.178.8.4764 (2007).
- 684 29 Persson, C. M. & Chambers, B. J. Plasmacytoid dendritic cell-induced  
685 migration and activation of NK cells in vivo. *Eur J Immunol* **40**, 2155-  
686 2164, doi:10.1002/eji.200940098 (2011).
- 687 30 Wang, B. *et al.* Combination cancer immunotherapy targeting PD-1 and  
688 GITR can rescue CD8(+) T cell dysfunction and maintain memory  
689 phenotype. *Sci Immunol* **3**, doi:10.1126/sciimmunol.aat7061 (2018).

- 690 31 Oberg, L. *et al.* Loss or mismatch of MHC class I is sufficient to trigger  
691 NK cell-mediated rejection of resting lymphocytes in vivo - role of  
692 KARAP/DAP12-dependent and -independent pathways. *Eur J Immunol*  
693 **34**, 1646-1653, doi:10.1002/eji.200424913 (2004).
- 694 32 Terme, M. *et al.* IL-18 induces PD-1-dependent immunosuppression in  
695 cancer. *Cancer Res* **71**, 5393-5399, doi:10.1158/0008-5472.CAN-11-  
696 0993 (2011).
- 697 33 Kim, S. *et al.* Licensing of natural killer cells by host major  
698 histocompatibility complex class I molecules. *Nature* **436**, 709-713,  
699 doi:10.1038/nature03847 (2005).
- 700 34 Brodin, P., Lakshmikanth, T., Johansson, S., Karre, K. & Hoglund, P.  
701 The strength of inhibitory input during education quantitatively tunes the  
702 functional responsiveness of individual natural killer cells. *Blood* **113**,  
703 2434-2441, doi:10.1182/blood-2008-05-156836 (2009).
- 704 35 Fernandez, N. C. *et al.* A subset of natural killer cells achieves self-  
705 tolerance without expressing inhibitory receptors specific for self-MHC  
706 molecules. *Blood* **105**, 4416-4423, doi:10.1182/blood-2004-08-3156  
707 (2005).
- 708 36 Chambers, B. *et al.* Induction of protective CTL immunity against  
709 peptide transporter TAP-deficient tumors through dendritic cell  
710 vaccination. *Cancer Res* **67**, 8450-8455 (2007).
- 711 37 Judge, S. J. *et al.* Minimal PD-1 expression in mouse and human NK  
712 cells under diverse conditions. *J Clin Invest*, doi:10.1172/JCI133353  
713 (2020).
- 714 38 Picelli, S. *et al.* Smart-seq2 for sensitive full-length transcriptome  
715 profiling in single cells. *Nat Methods* **10**, 1096-1098,  
716 doi:10.1038/nmeth.2639 (2013).
- 717 39 Butler, A., Hoffman, P., Smibert, P., Papalexi, E. & Satija, R. Integrating  
718 single-cell transcriptomic data across different conditions, technologies,  
719 and species. *Nat Biotechnol* **36**, 411-420, doi:10.1038/nbt.4096 (2018).
- 720 40 Stuart, T. *et al.* Comprehensive Integration of Single-Cell Data. *Cell* **177**,  
721 1888-1902 e1821, doi:10.1016/j.cell.2019.05.031 (2019).
- 722 41 Cooper, M. A. *et al.* Cytokine-induced memory-like natural killer cells.  
723 *Proc Natl Acad Sci U S A* **106**, 1915-1919,  
724 doi:10.1073/pnas.0813192106 (2009).
- 725 42 Hydes, T. *et al.* IL-12 and IL-15 induce the expression of CXCR6 and  
726 CD49a on peripheral natural killer cells. *Immun Inflamm Dis* **6**, 34-46,  
727 doi:10.1002/iid3.190 (2018).
- 728 43 Wagner, A. K. *et al.* Expression of CD226 is associated to but not  
729 required for NK cell education. *Nat Commun* **8**, 15627,  
730 doi:10.1038/ncomms15627 (2017).
- 731 44 Chalifour, A. *et al.* A Role for cis Interaction between the Inhibitory  
732 Ly49A receptor and MHC class I for natural killer cell education.  
733 *Immunity* **30**, 337-347, doi:10.1016/j.immuni.2008.12.019 (2009).
- 734 45 Bagawath-Singh, S. *et al.* Cytokines Induce Faster Membrane Diffusion  
735 of MHC Class I and the Ly49A Receptor in a Subpopulation of Natural  
736 Killer Cells. *Frontiers in immunology* **7**, 16,  
737 doi:10.3389/fimmu.2016.00016 (2016).
- 738 46 Zhao, Y. *et al.* Antigen-Presenting Cell-Intrinsic PD-1 Neutralizes PD-  
739 L1 in cis to Attenuate PD-1 Signaling in T Cells. *Cell Rep* **24**, 379-390  
740 e376, doi:10.1016/j.celrep.2018.06.054 (2018).

- 741 47 Guia, S. *et al.* Confinement of activating receptors at the plasma  
742 membrane controls natural killer cell tolerance. *Sci Signal* **4**, ra21,  
743 doi:10.1126/scisignal.2001608 (2011).
- 744 48 Alvarez, M. *et al.* Indirect Impact of PD-1/PD-L1 Blockade on a Murine  
745 Model of NK Cell Exhaustion. *Frontiers in immunology* **11**, 7,  
746 doi:10.3389/fimmu.2020.00007 (2020).
- 747 49 MacFarlane, A. W. t. *et al.* PD-1 expression on peripheral blood cells  
748 increases with stage in renal cell carcinoma patients and is rapidly  
749 reduced after surgical tumor resection. *Cancer Immunol Res* **2**, 320-331,  
750 doi:10.1158/2326-6066.CIR-13-0133 (2014).
- 751 50 Norris, S. *et al.* PD-1 expression on natural killer cells and CD8(+) T  
752 cells during chronic HIV-1 infection. *Viral Immunol* **25**, 329-332,  
753 doi:10.1089/vim.2011.0096 (2012).
- 754 51 Yao, S. *et al.* PD-1 on dendritic cells impedes innate immunity against  
755 bacterial infection. *Blood* **113**, 5811-5818, doi:10.1182/blood-2009-02-  
756 203141 (2009).
- 757 52 Chambers, B. J. in *Natural Killer Cells: Basic Science and Clinical*  
758 *Application* (ed M.T. Lotze, Thomson, A.W.) Ch. 22, 297-308  
759 (Academic Press, 2009).
- 760 53 Kerdiles, Y., Ugolini, S. & Vivier, E. T cell regulation of natural killer  
761 cells. *J Exp Med* **210**, 1065-1068, doi:10.1084/jem.20130960 (2013).
- 762 54 Alvarez, I. B. *et al.* Role played by the programmed death-1-  
763 programmed death ligand pathway during innate immunity against  
764 *Mycobacterium tuberculosis*. *J Infect Dis* **202**, 524-532,  
765 doi:10.1086/654932.
- 766 55 Golden-Mason, L., Klarquist, J., Wahed, A. S. & Rosen, H. R. Cutting  
767 edge: programmed death-1 expression is increased on immunocytes in  
768 chronic hepatitis C virus and predicts failure of response to antiviral  
769 therapy: race-dependent differences. *J Immunol* **180**, 3637-3641,  
770 doi:10.1093/infdis/jii363 [pii] (2008).
- 771 56 Schietinger, A. *et al.* Tumor-Specific T Cell Dysfunction Is a Dynamic  
772 Antigen-Driven Differentiation Program Initiated Early during  
773 Tumorigenesis. *Immunity* **45**, 389-401,  
774 doi:10.1016/j.immuni.2016.07.011 (2016).
- 775 57 Kinter, A. L. *et al.* The common gamma-chain cytokines IL-2, IL-7, IL-  
776 15, and IL-21 induce the expression of programmed death-1 and its  
777 ligands. *J Immunol* **181**, 6738-6746, doi:10.4049/jimmunol.181.10.6738  
778 (2008).
- 779 58 Quatrini, L. *et al.* Glucocorticoids and the cytokines IL-12, IL-15, and  
780 IL-18 present in the tumor microenvironment induce PD-1 expression on  
781 human natural killer cells. *J Allergy Clin Immunol* **147**, 349-360,  
782 doi:10.1016/j.jaci.2020.04.044 (2021).
- 783 59 Margadant, C. & Sonnenberg, A. Integrin-TGF-beta crosstalk in fibrosis,  
784 cancer and wound healing. *EMBO Rep* **11**, 97-105,  
785 doi:10.1038/embor.2009.276 (2010).
- 786 60 Park, S. J., Yang, S. W. & Kim, B. C. Transforming growth factor-beta1  
787 induces cell cycle arrest by activating atypical cyclin-dependent kinase 5  
788 through up-regulation of Smad3-dependent p35 expression in human  
789 MCF10A mammary epithelial cells. *Biochem Biophys Res Commun* **472**,  
790 502-507, doi:10.1016/j.bbrc.2016.02.121 (2016).

- 791 61 Metzger, P. *et al.* Dying cells expose a nuclear antigen cross-reacting  
792 with anti-PD-1 monoclonal antibodies. *Sci Rep* **8**, 8810,  
793 doi:10.1038/s41598-018-27125-6 (2018).
- 794 62 Bruno, A., Ferlazzo, G., Albini, A. & Noonan, D. M. A think tank of  
795 TINK/TANKs: tumor-infiltrating/tumor-associated natural killer cells in  
796 tumor progression and angiogenesis. *J Natl Cancer Inst* **106**, dju200,  
797 doi:10.1093/jnci/dju200 (2014).
- 798 63 Platonova, S. *et al.* Profound coordinated alterations of intratumoral NK  
799 cell phenotype and function in lung carcinoma. *Cancer Res* **71**, 5412-  
800 5422, doi:10.1158/0008-5472.CAN-10-4179 (2011).
- 801 64 Lin, D. Y. *et al.* The PD-1/PD-L1 complex resembles the antigen-  
802 binding Fv domains of antibodies and T cell receptors. *Proc Natl Acad*  
803 *Sci U S A* **105**, 3011-3016, doi:10.1073/pnas.0712278105 (2008).
- 804 65 Zak, K. M. *et al.* Structure of the Complex of Human Programmed Death  
805 1, PD-1, and Its Ligand PD-L1. *Structure* **23**, 2341-2348,  
806 doi:10.1016/j.str.2015.09.010 (2015).
- 807 66 Dong, W. *et al.* The Mechanism of Anti-PD-L1 Antibody Efficacy  
808 against PD-L1-Negative Tumors Identifies NK Cells Expressing PD-L1  
809 as a Cytolytic Effector. *Cancer Discov* **9**, 1422-1437, doi:10.1158/2159-  
810 8290.CD-18-1259 (2019).
- 811 67 Park, S. J. *et al.* Negative role of inducible PD-1 on survival of activated  
812 dendritic cells. *J Leukoc Biol* **95**, 621-629, doi:10.1189/jlb.0813443  
813 (2014).
- 814 68 Zhao, Y. *et al.* PD-L1:CD80 Cis-Heterodimer Triggers the Co-  
815 stimulatory Receptor CD28 While Repressing the Inhibitory PD-1 and  
816 CTLA-4 Pathways. *Immunity* **51**, 1059-1073 e1059,  
817 doi:10.1016/j.immuni.2019.11.003 (2019).
- 818 69 Duan, J. *et al.* Use of Immunotherapy With Programmed Cell Death 1 vs  
819 Programmed Cell Death Ligand 1 Inhibitors in Patients With Cancer: A  
820 Systematic Review and Meta-analysis. *JAMA Oncol*,  
821 doi:10.1001/jamaoncol.2019.5367 (2019).
- 822 70 Topalian, S. L., Drake, C. G. & Pardoll, D. M. Targeting the PD-1/B7-  
823 H1(PD-L1) pathway to activate anti-tumor immunity. *Curr Opin*  
824 *Immunol* **24**, 207-212, doi:10.1016/j.coi.2011.12.009 (2012).
- 825 71 Martin-Fontecha, A. *et al.* Induced recruitment of NK cells to lymph  
826 nodes provides IFN-gamma for T(H)1 priming. *Nat Immunol* **5**, 1260-  
827 1265 (2004).
- 828 72 Mombaerts, P. *et al.* RAG-1-deficient mice have no mature B and T  
829 lymphocytes. *Cell* **68**, 869-877 (1992).
- 830 73 Smith, L. E. *et al.* Sensitivity of dendritic cells to NK-mediated lysis  
831 depends on the inflammatory environment and is modulated by  
832 CD54/CD226-driven interactions. *J Leukoc Biol* **100**, 781-789,  
833 doi:10.1189/jlb.3A0615-271RR (2016).
- 834 74 Hoglund, P. *et al.* Beta2-microglobulin-deficient NK cells show  
835 increased sensitivity to MHC class I-mediated inhibition, but self  
836 tolerance does not depend upon target cell expression of H-2Kb and Db  
837 heavy chains. *Eur J Immunol* **28**, 370-378, doi:10.1002/(SICI)1521-  
838 4141(199801)28:01<370::AID-IMMU370>3.0.CO;2-W (1998).
- 839 75 Chen, Y. *et al.* A dimeric structure of PD-L1: functional units or  
840 evolutionary relics? *Protein Cell* **1**, 153-160, doi:10.1007/s13238-010-  
841 0022-1 (2010).

842 76 Waterhouse, A. *et al.* SWISS-MODEL: homology modelling of protein  
843 structures and complexes. *Nucleic acids research* **46**, W296-W303,  
844 doi:10.1093/nar/gky427 (2018).  
845 77 Emsley, P., Lohkamp, B., Scott, W. G. & Cowtan, K. Features and  
846 development of Coot. *Acta Crystallogr D Biol Crystallogr* **66**, 486-501,  
847 doi:10.1107/S0907444910007493 (2010).  
848 78 Vukojevic, V. *et al.* Quantitative single-molecule imaging by confocal  
849 laser scanning microscopy. *Proc Natl Acad Sci U S A* **105**, 18176-18181,  
850 doi:10.1073/pnas.0809250105 (2008).  
851 79 Staaf, E., Bagawath-Singh, S. & Johansson, S. Molecular Diffusion in  
852 Plasma Membranes of Primary Lymphocytes Measured by Fluorescence  
853 Correlation Spectroscopy. *J Vis Exp*, doi:10.3791/54756 (2017).  
854  
855

856 **FIGURE LEGENDS**

857 **Figure 1. Phenotype of NK cells from WT and PD-1<sup>-/-</sup> mice.** (a) Expression of  
858 CD11b and CD27 on NK cells from WT (open boxplots) and PD-1<sup>-/-</sup> (shaded boxplots)  
859 mice (\*p<0.01 Mann-Whitney test, n=18-20 mice (b) Expression of KLRG1 on NK  
860 cells from WT and PD-1<sup>-/-</sup> mice (\*p<0.01 Mann-Whitney test, n=18-20 mice). (c)  
861 Expression of CD62L on NK cells from WT and PD-1<sup>-/-</sup> mice. (d) Expression of  
862 DNAM-1 on NK cells from WT and PD-1<sup>-/-</sup> mice, bar graphs represent percent  
863 expressing cells and the mean fluorescent intensity of expression (\*p<0.01 Mann-  
864 Whitney test, n=18-20 mice. (e) Expression of inhibitory Ly49 molecules and NKG2A  
865 on NK cells from WT and PD-1<sup>-/-</sup> mice (\*p<0.01 Mann Whitney n=18-20 mice). (f)  
866 Expression of activating Ly49 molecules on NK cells from WT and PD-1<sup>-/-</sup> mice.  
867 (\*p<0.01 Mann-Whitney test, n=18-20 mice). (g) Expression of Ly49D and Ly49H  
868 populations on NK cells from WT and PD-1<sup>-/-</sup> mice (\*p<0.01 Mann-Whitney test, n=18-  
869 20 mice).

870

871 **Figure 2. PD-1-deficient mice exhibit poor rejection of MHC-I-deficient cells.** (a)  
872 WT and MHC-I<sup>-/-</sup> splenocytes labelled with CFSE were injected and the rejection ratio  
873 measured in WT, PD-1<sup>-/-</sup> and MHC-I<sup>-/-</sup> mice \*\*\*p<0.001 (ANOVA three separate  
874 experiments total of 6-8 mice). (b) Rejection of RMA-S cells injected s.c. WT and PD-  
875 I<sup>-/-</sup> mice were given an LD<sub>50</sub> dose of RMA-S cells (10<sup>5</sup> cells) and the survival rate of  
876 mice was measured (survival measured using log rank test, three separate experiments  
877 with n= 15-16 mice). (c) Percent intratumoral NK cells amongst the lymphocyte  
878 population in mice receiving RMA-S. (d-e) Expression of PD-1 on intratumoral NK  
879 cells in RMA-S treated mice compared to expression on splenocytes (\*\*p<0.001 Mann-  
880 Whitney test). (f) Expression of PD-1 on intratumoral KLRG1<sup>+</sup> and KLRG1<sup>-</sup> NK cell  
881 populations (p<0.05 paired t-test). (g) Frequency of intratumoral NK cells amongst



882 lymphocytes in mice receiving MTAP1A (\*\*p<0.01 Mann-Whitney test). (h-i)  
883 Expression of PD-1 on intratumoral NK cells in MTAP1A treated mice compared to  
884 expression on splenocytes (\*\*p<0.01 Mann-Whitney test, n=12-15 mice). (j) Expression  
885 of PD-1 on intratumoral KLRG1<sup>+</sup> and KLRG1<sup>-</sup> NK cell populations in MTAP1A  
886 tumors (\*\*p<0.01 paired t-test n=8).

887

888 **Figure 3. Single cell analysis of intratumoral NK cells.** (a, b) UMAP projection of  
889 746 tumor-infiltrating NK cells (371 WT cells, 375 PD-1<sup>-/-</sup> cells). (c) Percentage of each  
890 cluster derived from either WT or PD-1<sup>-/-</sup> NK cells. (d-i) Violin plots for several genes  
891 enriched across various clusters. (j) Violin plots depicting expression of several genes  
892 differentially expressed between WT and PD-1<sup>-/-</sup> NK cells.

893

894 **Figure 4. Induction of PD-1 on NK cells following cytokines stimulation.** (a) PD-1  
895 expression on WT NK cells (white histogram) following stimulation with IL-12/15/18  
896 for 4 days, expression on PD-1<sup>-/-</sup> NK cells is shown as comparison (grey histogram). (b)  
897 Expression of PD-1 on NK cells from RAG1<sup>-/-</sup> mouse following cytokine stimulation.  
898 (c) Expression of PD-1 on DNAM-1 and NKG2A populations following cytokine  
899 stimulation (from four experiments. (d) Intracellular levels of IFN $\gamma$  following cytokine  
900 stimulation of NK cells from (dashed line) WT mice and (shaded line) PD-1<sup>-/-</sup> mice  
901 (representative plot from three experiments). (e) Expression of CXCR6 on the surface  
902 following cytokine stimulation of of NK cells from (dashed line) WT mice and (shaded  
903 line) PD-1<sup>-/-</sup> mice.

904

905 **Figure 5. Movement of PD-L1 in WT and PD-1<sup>-/-</sup> NK cells.** (a) Representative FCS  
906 auto correlation curves of PD-L1 on PD-1 positive (*right panel*) and PD-1<sup>-/-</sup> NK cells  
907 (*left panel*), decline part of the curve indicates the rate of diffusion on cell membrane.

908 FCS readouts of PD-L1 molecule on PD-1 positive and negative NK cells. (b) The  
909 diffusion rate of PD-L1, (c) the density of PD-L1 and (d) the counts per molecule  
910 (CPM) of PD-L1 were measured on individual PD-1<sup>+</sup> NK cells from *RAG1*<sup>-/-</sup> mice and  
911 NK cells from *PD-1xRAG1*<sup>-/-</sup> mice. (b) The diffusion rate of PD-L1 is faster in the  
912 absence of PD-1. (c) The density of PD-L1 was higher on *PD-1xRAG1*<sup>-/-</sup> NK cells,  
913 while (d) the CPM, indicates the size of the cluster measured based on the brightness or  
914 number of molecules per entity, PD-L1 clusters was higher when PD-1 was present. (e)  
915 Model for PD-L1 movement in the membrane in the presence and absence of PD-1.  
916 Comparison between two unpaired groups of 12 NK cells by Mann Whitney test, \*\*\*  
917  $p < 0.001$ .

918

919 **Figure 6. Molecular Modelling of PD-1-PD-L1 *cis*-interaction.** The 24 amino  
920 residues long stalk region of PD-1 is long and flexible enough to allow for both *trans*-  
921 and *cis*-interaction between PD-1 and PD-L1. (a) *Trans*-interaction between PD-L1 on  
922 tumor cells and PD-1 on NK cells. (b) *Cis*-interaction between PD-1 and PD-L1 on NK  
923 cells. The interactions and mode of binding between the N-terminal part of PD-L1 and  
924 PD-1 could be highly similar, as found in the crystal structure of the human PD-1/PD-  
925 L1 complex<sup>65</sup>. The stalk-region of PD-1 (residues R147-V170) was modelled in an  
926 arbitrary extended conformation to show that its length is sufficient to allow for *cis*-  
927 interaction with the N-terminal domain of PD-L1.

928

929

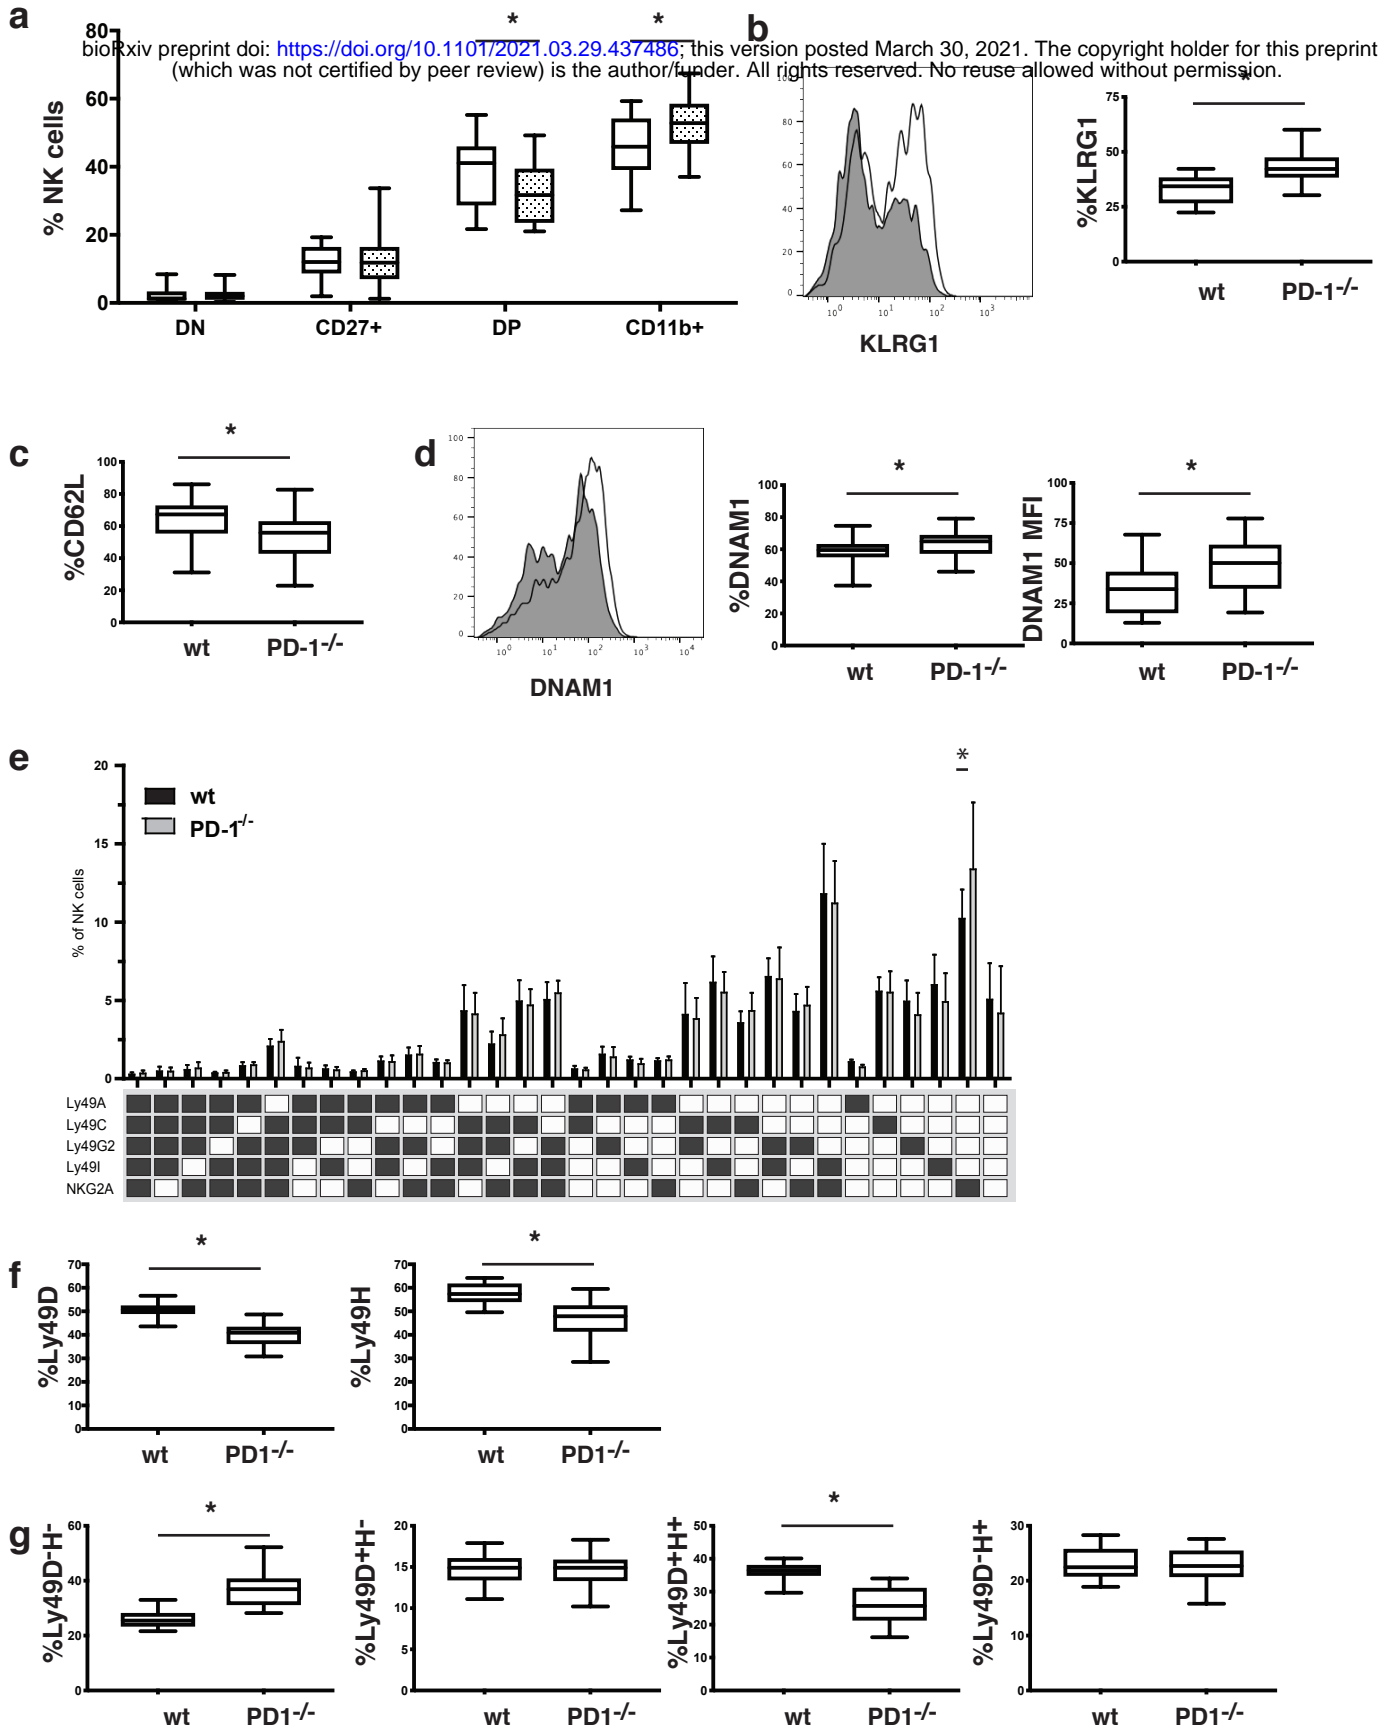

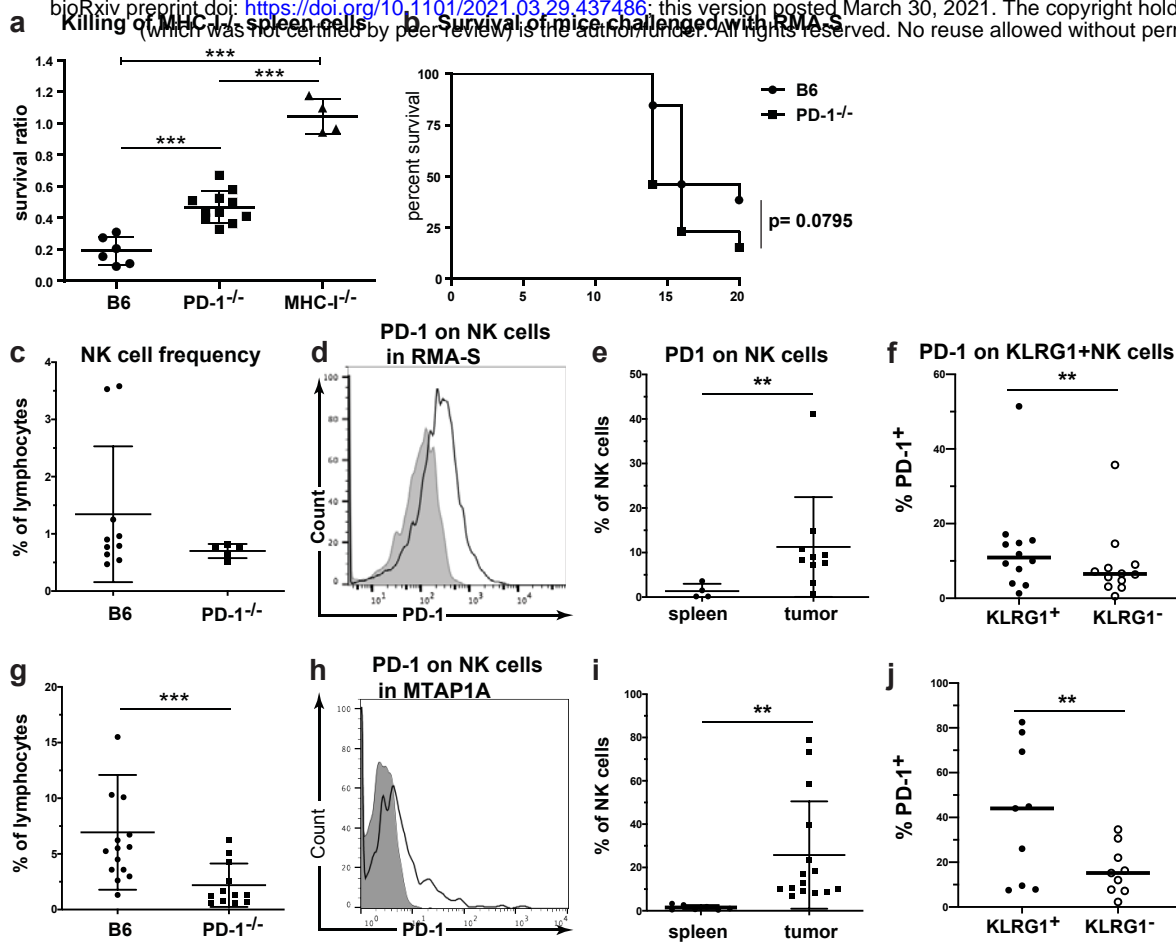

**a**

bioRxiv preprint doi: <https://doi.org/10.1101/2021.03.29.437486>; this version posted March 30, 2021. The copyright holder for this preprint (which was not certified by peer review) is the author/funder. All rights reserved. No reuse allowed without permission.

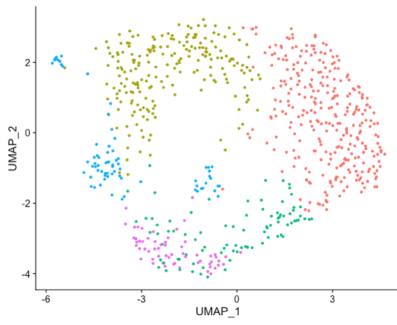**b**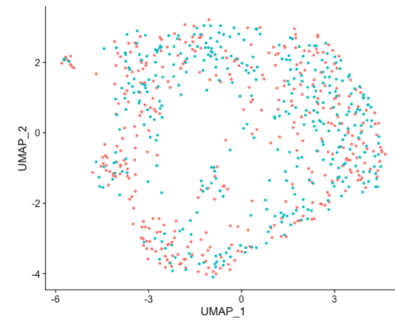**c**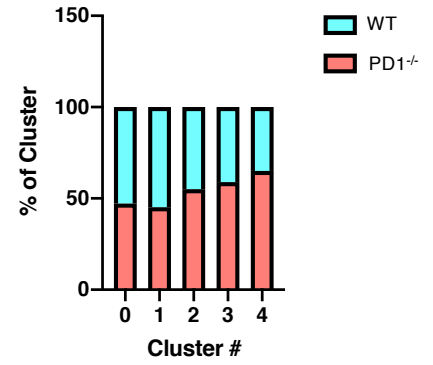**d**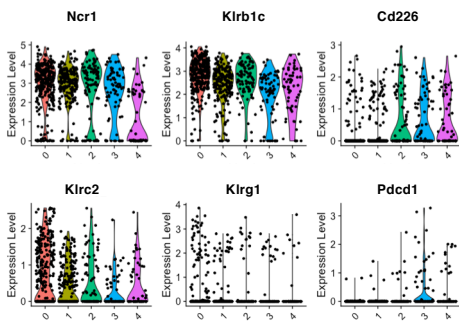**e**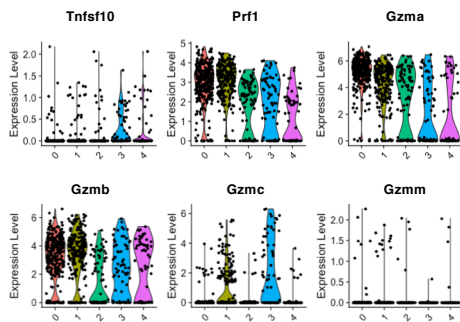**j**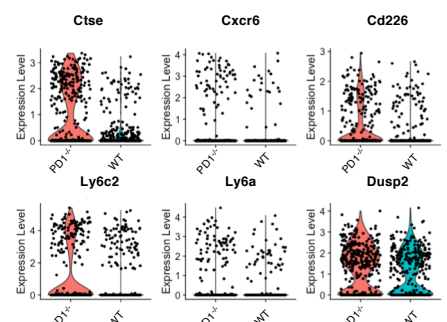**f**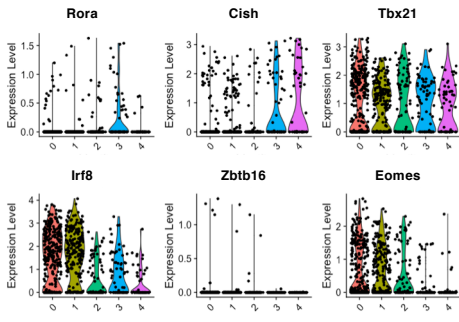**g**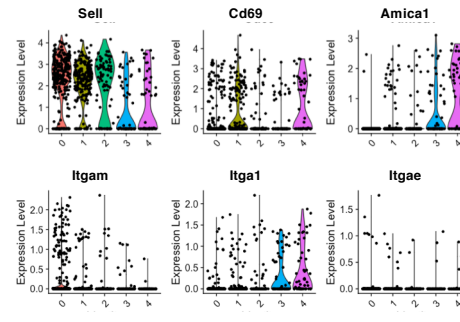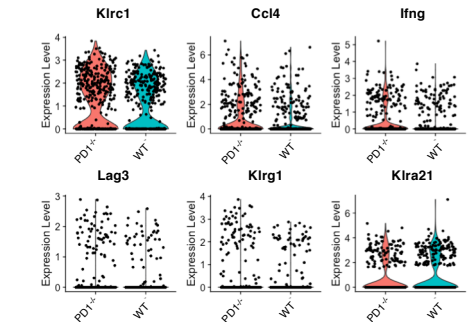**h**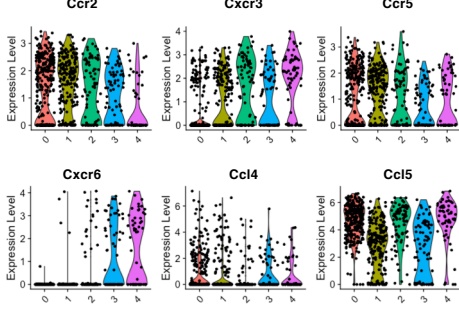**i**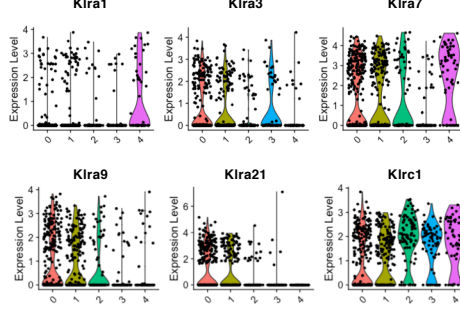

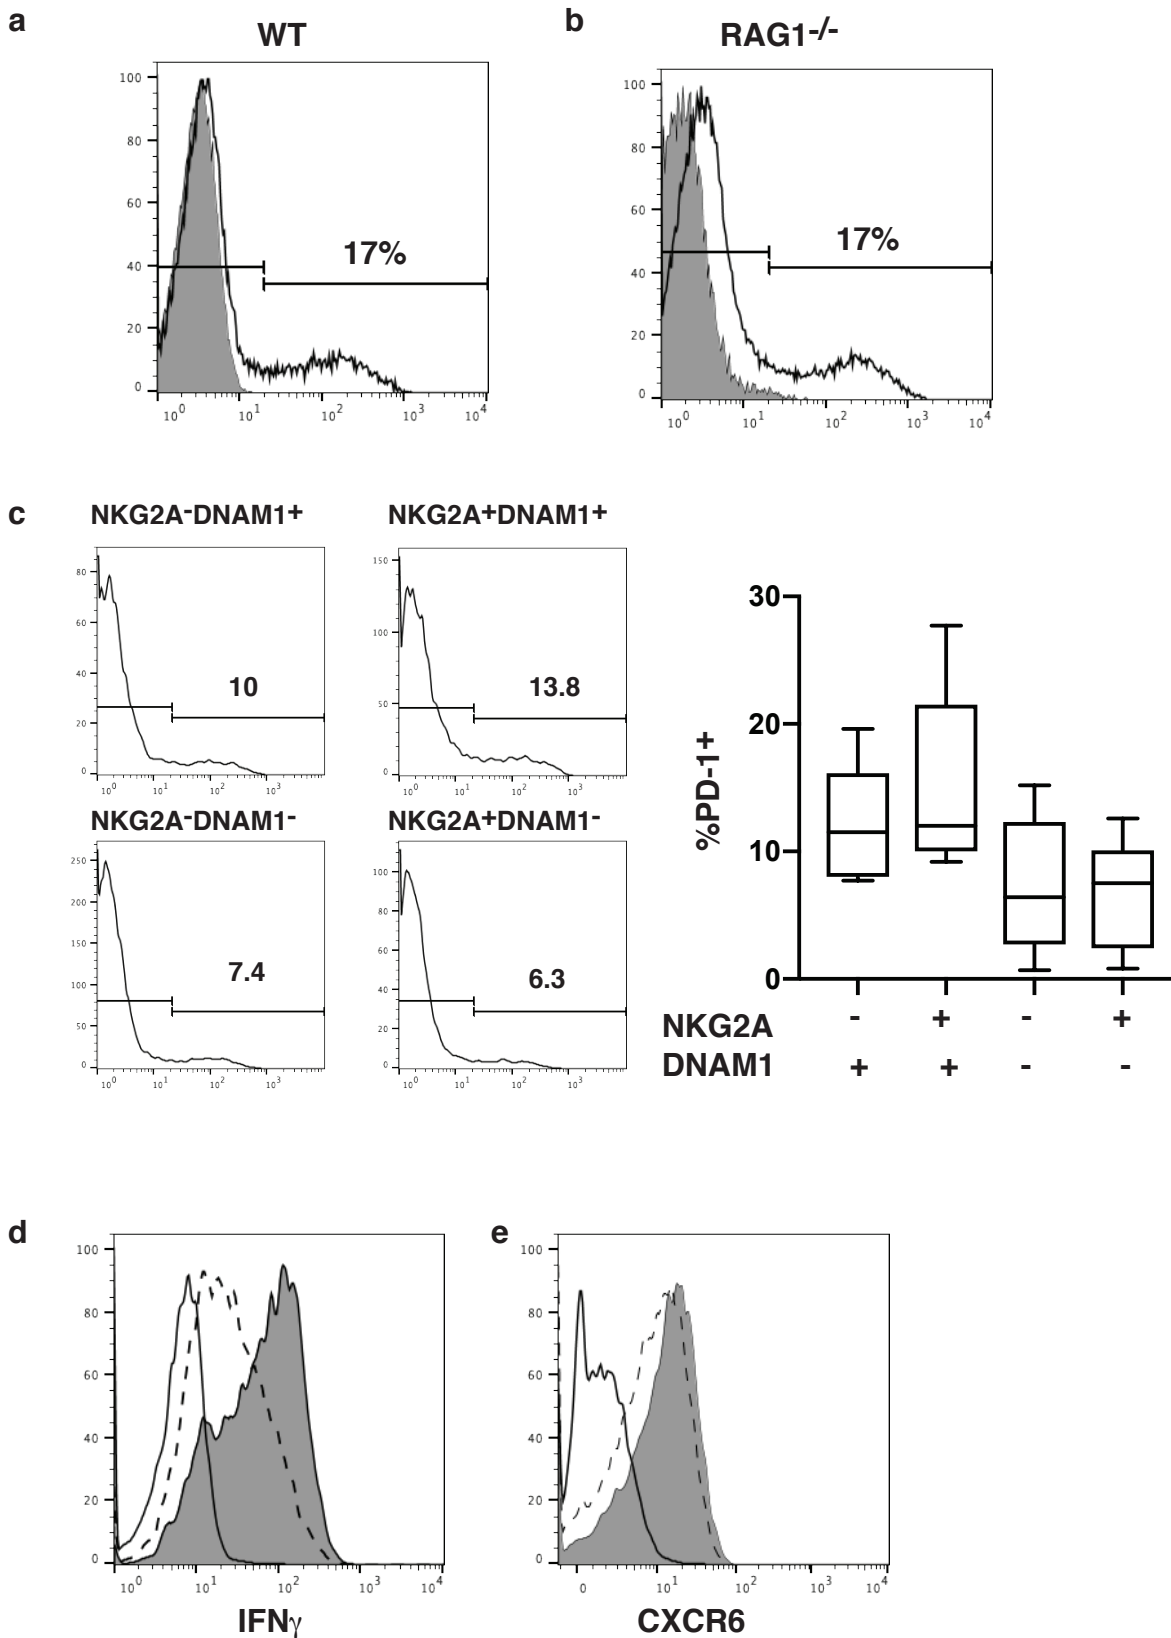

**a****PD1+ NK cells**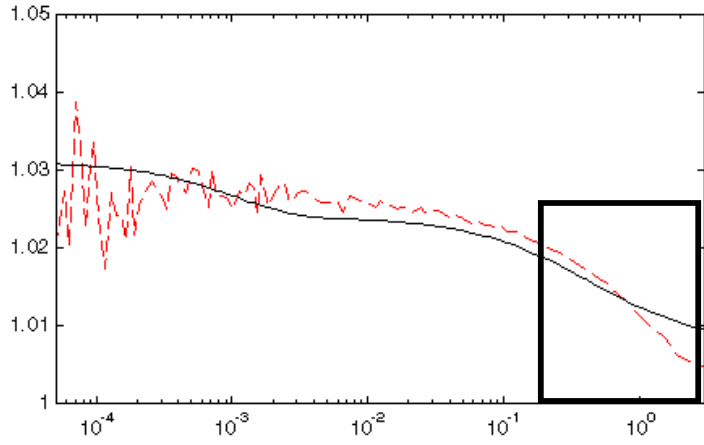**PD-1<sup>-/-</sup> NK cell**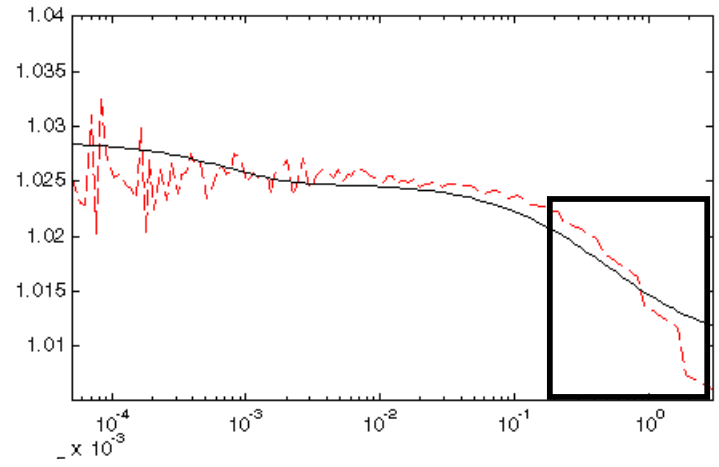**b**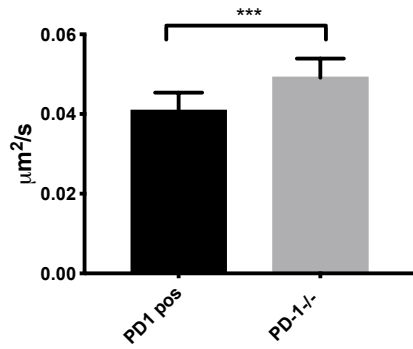**c**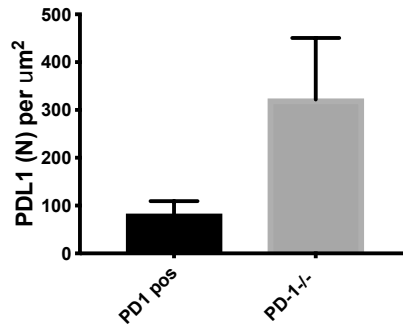**d**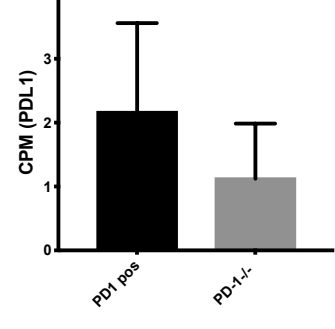**e**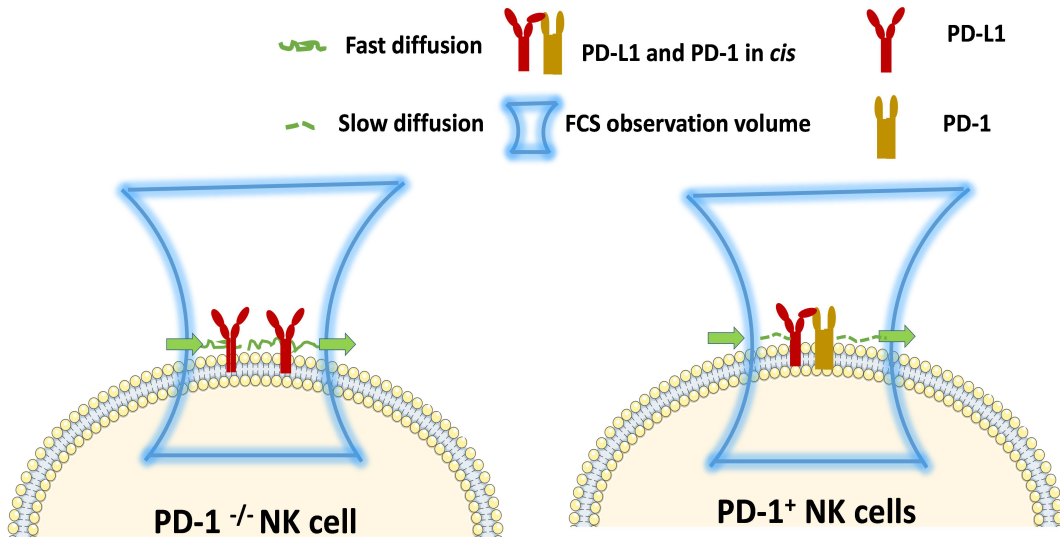

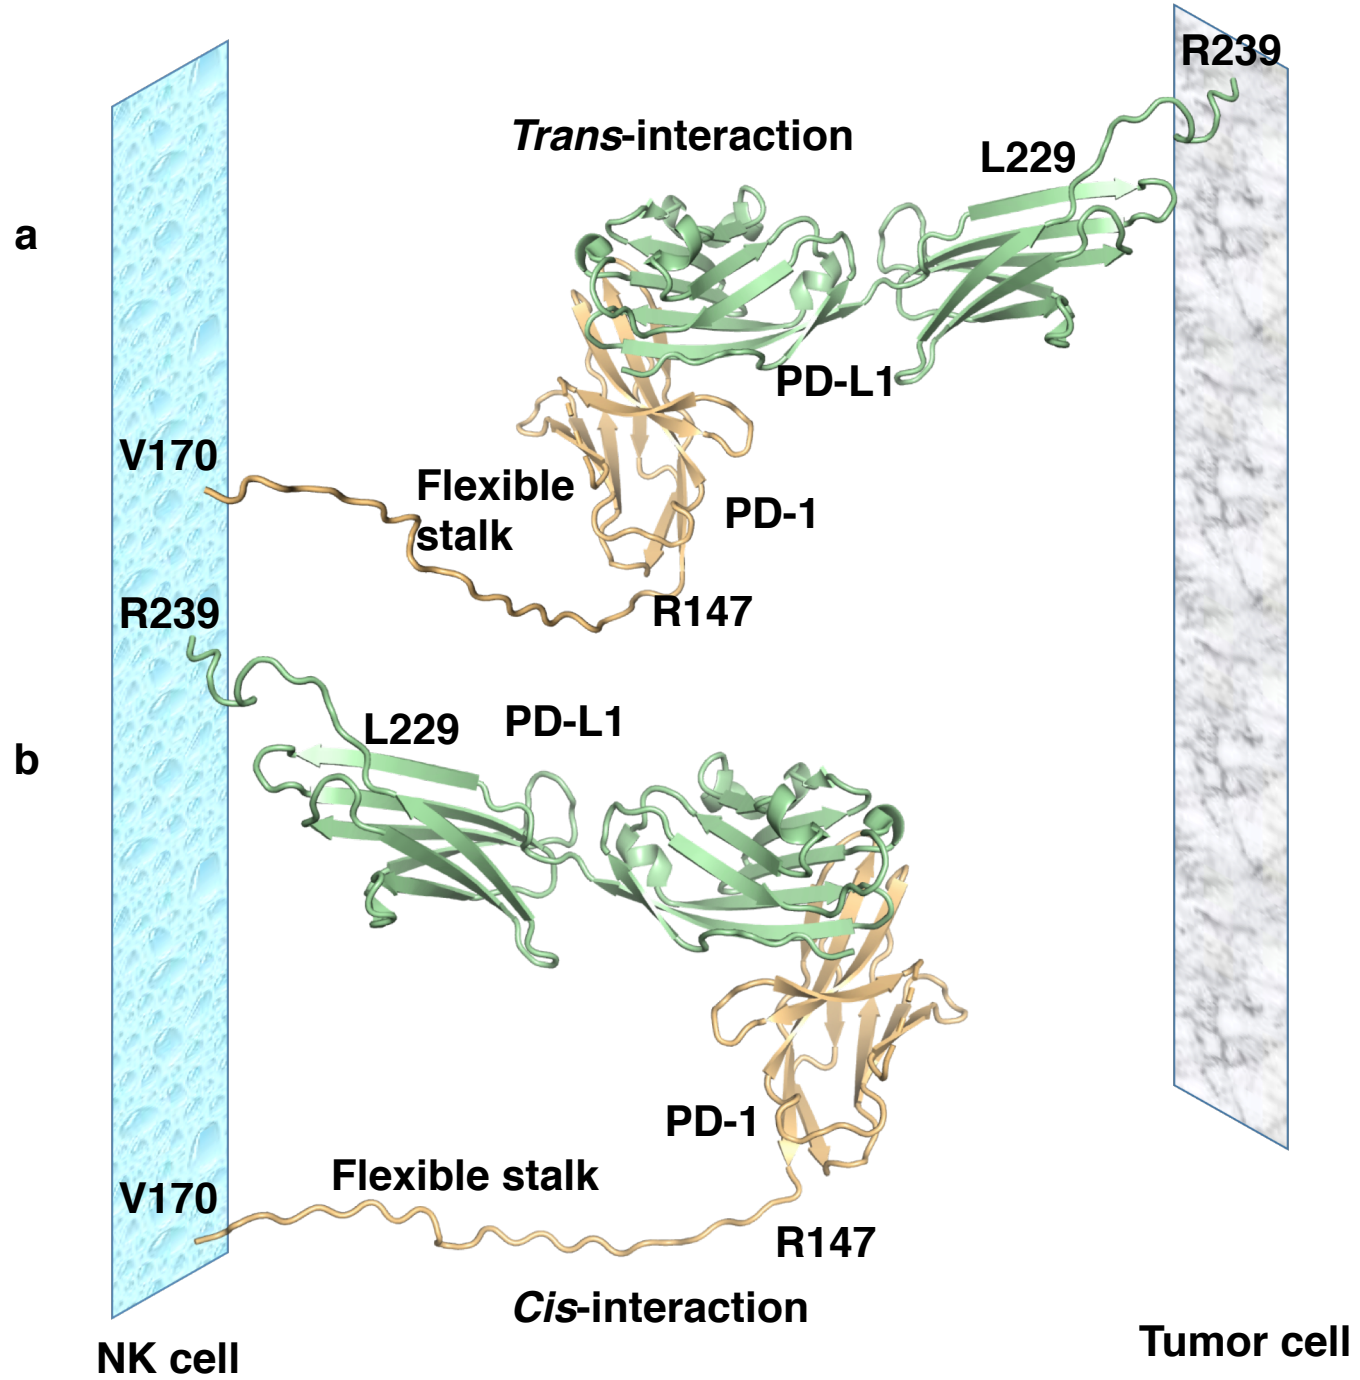

Source: https://biorxiv.org/content/10.1101/2021.03.29.437486v1.full.pdf
